1 **Genome-wide screen identifies curli amyloid fibril as a bacterial component promoting**  
2 **host neurodegeneration**

3

4 Chenyin Wang<sup>1</sup>, Chun Yin Lau<sup>1</sup>, Fuqiang Ma<sup>1</sup>, and Chaogu Zheng<sup>1,2</sup>

5

6 <sup>1</sup>School of Biological Sciences, The University of Hong Kong, Hong Kong SAR, China

7 <sup>2</sup>Correspondence: [cgzhenh@hku.hk](mailto:cgzhenh@hku.hk) (C.Z.)

8

9

10

11

12

13

14

15

16

17

18

19

20

21

22

23

24

25

26

27

28

29

30

31

32

33

34

## 35 **Abstract**

36 Growing evidence indicate that gut microbiota play a critical role in regulating the progression of  
37 neurodegenerative diseases, such as Parkinson's disease (PD). The molecular mechanism underlying  
38 such microbe-host interaction is unclear. In this study, by feeding *C. elegans* expressing human  $\alpha$ -syn  
39 with *E. coli* knockout mutants, we conducted a genome-wide screen to identify bacterial genes that  
40 promote host neurodegeneration. The screen yielded 38 genes that fall into several genetic pathways,  
41 including curli formation, lipopolysaccharide assembly, adenosylcobalamin biosynthesis among  
42 others. We then focused on the curli amyloid fibril and found that genetically deleting or  
43 pharmacologically inhibiting the curli major subunit CsgA in *E. coli* reduced  $\alpha$ -syn-induced neuronal  
44 death, restored mitochondrial health, and improved neuronal functions. CsgA secreted by the bacteria  
45 colocalized with  $\alpha$ -syn inside neurons and promoted  $\alpha$ -syn aggregation through cross-seeding.  
46 Similarly, curli also promoted neurodegeneration in *C. elegans* models of AD, ALS, and HD and in  
47 human neuroblastoma cells.

48

## 49 **Introduction**

50 Neurodegenerative diseases are characterized by protein misfolding and aggregation, leading to  
51 the formation of amyloid fibril enriched in  $\beta$ -sheet structures. Such protein aggregates trigger  
52 proteotoxicity, overwhelm the chaperone and degradation machineries, and eventually cause neuronal  
53 death (Douglas and Dillin, 2010). For example, Parkinson's disease (PD) is associated with the  
54 intracellular aggregation of  $\alpha$ -synuclein ( $\alpha$ -syn) into Lewy bodies and Lewy neurites, which causes  
55 the degeneration of mostly dopaminergic (DA) neurons in the substantia nigra (Poewe et al., 2017).  
56 The loss of DA neurons leads to decreased dopamine signaling in the striatum, which results in  
57 impaired motor functions in PD patients. At the molecular level,  $\alpha$ -syn is a small (140 amino acid)  
58 protein made of three domains: an N-terminal domain, a non-A $\beta$  component (NAC) domain that is the  
59 fibrilization core, and a C-terminal region. Missense mutations in the N-terminal domain, such as  
60 A30P, G46K, and A53T, result in autosomal dominant familial PD by producing  $\alpha$ -syn mutant  
61 proteins that are more prone to misfolding and aggregation than the wild-type  $\alpha$ -syn (Stefanis, 2012).  
62 Mutant  $\alpha$ -syn proteins form toxic  $\beta$ -sheet-like oligomers that cause mitochondrial dysfunctions,  
63 oxidative stress, disruption in calcium homeostasis, and neuroinflammation, which all lead to  
64 neurodegeneration (Poewe et al., 2017). Effective therapeutic intervention that prevent  $\alpha$ -syn  
65 aggregation is currently missing.

66 Studies in the last few years have suggested that the gut microbiota may play an important role in  
67 the pathogenesis of neurodegenerative diseases (Quigley, 2017). For example, antibiotic treatment  
68 ameliorate the pathophysiology of PD mice and microbial recolonization after the treatment restored  
69 the PD symptoms (Sampson et al., 2016). Colonization of  $\alpha$ -syn-overexpressing mice with microbiota  
70 from PD patients enhanced the physical impairments, compared to transplantation of microbiota from

71 healthy human donors (Sampson et al., 2016). In addition to animal models, clinical studies have also  
72 provided evidence for a microbiota-gut-brain link in PD. Gastrointestinal dysfunction was frequently  
73 found in PD patients (Quigley, 1996) and infection with *Helicobacter pylori* has been linked with  
74 disease severity and progression (Tan et al., 2015). Sequencing of the fecal samples of PD patients  
75 revealed changes in the gut bacterial composition (e.g. increased *Lactobacillaceae*) compared to  
76 healthy individuals (Barichella et al., 2019; Hopfner et al., 2017). Similar to PD, gut bacteria in mouse  
77 models of Alzheimer's disease (AD) promoted amyloid pathology (Harach et al., 2017) and altered  
78 gut microbiome composition was also observed in AD patients (Cattaneo et al., 2017).

79 Despite the growing connection between the disturbed gut microbiota and the development of  
80 neurodegenerative diseases, mechanistic understanding of the communication between the bacteria  
81 and the nervous system is limited. Most theories focus on the neurodegenerative effects of the  
82 systemic inflammation and neuroinflammation caused by the abnormal microbiota. Whether bacteria  
83 proteins or metabolites can directly act on the host neurons to modulate the progression of  
84 neurodegeneration induced by  $\alpha$ -syn or A $\beta$  proteotoxicity is unclear. This limitation is largely due to  
85 the lack of a simple model that allows systematic tests of individual bacterial components for their  
86 neuronal effects in promoting degeneration.

87 To address the problem, we employed a *Caenorhabditis elegans* model of PD that expressed the  
88 human  $\alpha$ -syn proteins in *C. elegans* neurons to investigate the mechanisms of microbial regulation on  
89 PD. Because *C. elegans* use bacteria as their natural diet and can be easily cultivated under axenic or  
90 monoaxenic conditions, it has emerged as an important organism to model microbe-host interaction.  
91 In fact, previous studies found that alteration of the bacterial genome affected the development,  
92 metabolism, and behaviour of *C. elegans* (Watson et al., 2014; Zhang et al., 2019).

93 In this study, we screened all non-essential *E. coli* genes for their effects on PD pathogenesis by  
94 feeding individual *E. coli* knockout mutants to PD *C. elegans* and assessing the severity of  
95 neurodegeneration. This screen identified 38 *E. coli* genes whose deletion led to amelioration of PD  
96 symptoms. These genes fall into distinct genetic pathways, including curli formation,  
97 lipopolysaccharide (LPS) production, lysozyme inhibition, biosynthesis of adenosylcobalamin, and  
98 oxidative stress response. These results suggested that diverse bacteria components could promote  
99 neurodegeneration. As an example, we next focused on the role of bacterial curli amyloid fibril on PD  
100 and found that deleting the curli genes *csgA* and *csgB* in the *E. coli* genome reduced  $\alpha$ -syn-induced  
101 cell death, restored mitochondrial health, and improved neuronal functions. Using antibody staining  
102 and biochemical analysis, we showed that CsgA promoted  $\alpha$ -syn aggregation and removing curli in  
103 the bacteria diet enabled proteasome-dependent degradation of  $\alpha$ -syn in neurons. Although previous  
104 studies observed the cross-seeding between curli and  $\alpha$ -syn *in vitro*, we provided direct evidence to  
105 show that bacteria-derived CsgA colocalized with  $\alpha$ -syn in *C. elegans* neurons at a single-cell  
106 resolution. More importantly, we extended our findings into *C. elegans* models of AD, Amyotrophic

107 lateral sclerosis (ALS), and Huntington's disease (HD), and into human neuroblastoma SH-SY5Y  
108 cells. Overall, our studies indicate that bacteria components, such as curli, can have direct  
109 neurodegenerative effects by promoting protein aggregation.

110

## 111 **Results**

### 112 **A genome-wide screen identified *E. coli* genes that promote human $\alpha$ -synuclein-induced** 113 **neurodegeneration in *C. elegans***

114 To systematically identify bacterial genes that contribute to neurodegeneration in the host, we  
115 employed *C. elegans* transgenic animals that express the human  $\alpha$ -syn in all neurons and screened for  
116 *E. coli* K12 knockout mutants that could ameliorate *C. elegans* neurodegenerative phenotypes when  
117 fed to the animals. Pan-neuronal expression (using the *aex-3* promoter) of the pro-aggregating human  
118  $\alpha$ -syn A53T mutants but not the wild-type  $\alpha$ -syn led to degeneration of the motor neurons, causing  
119 uncoordinated (Unc) movements in both larva and adults (Lakso et al., 2003). The penetrance of this  
120 Unc phenotype is 100% in animals carrying the *aex-3p:: $\alpha$ -syn(A53T)* transgene and fed with the wild-  
121 type *E. coli* K12 strain. By screening the 3985 K12 knockout mutants in the Keio collection (Baba et  
122 al., 2006), we identified 380 *E. coli* mutants that restored normal locomotion (non-Unc) in at least  
123 25% of the PD animals in the first round (Figure 1A). These 380 positive clones were subjected to  
124 three more rounds of locomotion screens, and we obtained 172 mutants that led to consistent recovery  
125 of locomotion in  $\geq 25\%$  of the PD animals on average (Figure 1B). We then subjected the 172  
126 positive clones to a visual screen for the suppression of neuronal death using a dopaminergic (DA)  
127 neuronal marker. When fed with wild-type K12, only  $\sim 10\%$  of the PD animals carrying the *aex-  
128 3p:: $\alpha$ -syn(A53T)* transgene had two visible ADE neurons labelled by *dat-1p::GFP* at day 2 adult  
129 stage (Figure 1C). By screening the above 172 clones for three repeated rounds, we identified 104 *E.  
130 coli* mutants that resulted in the survival of two ADE neurons in  $\geq 25\%$  of the animals on average.

131 To avoid any bias associated with specific genetic background, we conducted a separate visual  
132 screen using an independent PD model, in which the human  $\alpha$ -syn A53T mutant protein was  
133 expressed from the DA-specific *dat-1* promoter. We fed the 380 first round positive *E. coli* knockout  
134 mutants to animals carrying the *dat-1p:: $\alpha$ -syn(A53T)* transgene. Through three rounds of screens, we  
135 identified 78 *E. coli* mutants that led to the survival of two ADE neurons in  $\geq 25\%$  in these DA-  
136 specific degenerative model (Figure 1A). By overlapping these 78 positive clones with the 104  
137 positive hits found using the pan-neuronal model, we obtained the final 38 *E. coli* mutants that  
138 significantly inhibited neurodegeneration induced by human  $\alpha$ -syn A53T mutants.

139 We categorized the 38 *E. coli* genes that contribute to neurodegeneration based on their functions  
140 and several microbial genetic pathways emerged (Table 1). For example, we identified genes  
141 responsible for the formation of curli amyloid fibril (*csgA* and *csgB*), the production and assembly of  
142 LPS (*lapA*, *lapB*, *lpcA*, *rfe*, and *pldA*), biosynthesis of adenosylcobalamin (*cobS*, *btuR*, and *eutT*),

143 inhibition of eukaryotic lysozyme (*ivy* and *ydhA*), as well as genes involved in oxidative stress  
144 response, energy homeostasis, membrane transport, and other functions. Our systematic screen  
145 revealed extensive microbe-host interactions, through which bacterial molecules promote  $\alpha$ -syn  
146 proteotoxicity and neurodegeneration in the host. In this study, we focus on the mechanisms by which  
147 bacterial curli promotes neurodegeneration.

148

### 149 **Curli subunits CsgA and CsgB are required for $\alpha$ -syn-induced degenerative phenotypes**

150 Among the top hits in our screen are *csgA* and *csgB*, which code for the major and minor curli  
151 subunits. Curli are amyloid fibrils secreted by certain enterobacterial strains, such as *E. coli* and  
152 *Salmonella*, and are important for biofilm formation (Evans and Chapman, 2014). Deletion of *csgA* or  
153 *csgB* in *E. coli* K12 fed to *C. elegans* resulted in significantly improved motor functions (measured as  
154 the number of body bends per 20 seconds) in animals expressing  $\alpha$ -syn(A53T) pan-neuronally (Figure  
155 1D) and largely restored dopaminergic neuron functions (measured as food-induced basal slowing  
156 response) in animals expressing  $\alpha$ -syn(A53T) specifically in DA neurons (Figure 1E). These results  
157 suggest that *E. coli* curli promotes  $\alpha$ -syn-induced neurodegeneration in *C. elegans*.

158 Congo red can stain curli amyloid fibrils. As expected, deletion of *csgA* and *csgB* led to the  
159 complete loss of Congo red staining (Figure 2A). We also stained the other 36 *E. coli* mutants  
160 identified from our screen and found that *tolQ(-)*, *lpcA(-)*, *lapA(-)*, and *lapB(-)* mutants showed weak  
161 Congo red staining, indicating reduced curli production. These four genes were previously found to be  
162 associated with curli biogenesis (Smith et al., 2017), so their effects in promoting neurodegeneration  
163 may be partly connected to their roles in enhancing curli production. In contrast, the rest 32 mutants  
164 showed largely wild-type level of staining (Figure S1A).

165 To support that curli functions as structured protein fibrils in *C. elegans*, we heat-killed the K12  
166 wild-type bacteria to denature all proteins and found that the heat-kill phenocopied the *csgA(-)* and  
167 *csgB(-)* deletion in suppressing  $\alpha$ -syn-induced locomotion defects and ADE degeneration (Figure  
168 2B). Importantly, heat-kill did not further enhance the effects of curli deletion. Interestingly, we found  
169 that mixing the wild-type K12 with *csgA(-)* or *csgB(-)* bacteria strongly suppressed the  
170 neuroprotective effects of the mutants, suggesting that a small amount of curli may be enough to  
171 trigger neurodegeneration (Figure 2B). Moreover, mixing *csgA(-)* with *csgB(-)* also eliminated their  
172 neuroprotective effects (Figure 2B), likely because the CsgA proteins produced by *csgB(-)* mutants  
173 can bind to CsgB produced by *csgA(-)* mutants. Such cross-seeding allows the assembly of curli fibrils  
174 and was previously observed (Evans and Chapman, 2014).

175 Next, we switched the diet of the PD animals between wild-type K12 and *csgA(-)* mutants at  
176 different developmental stages and found that the  $\alpha$ -syn-induced locomotion defects and ADE  
177 degeneration is largely associated with post-L4 and adult consumption of the curli-producing bacteria  
178 (Figure 2C). Whether the animals were exposed to curli in larval development did not affect much on

179 neurodegeneration. Since L4 and adult animals consumed more food than younger animals, the  
180 amount of curli uptake may be associated with the severity of the degenerative phenotypes.

181

### 182 **Pharmacological inhibition of *csgA* expression suppresses neurodegeneration**

183 In addition to genetic inactivation of curli subunits, we also used pharmacological agents to  
184 inhibit curli production and tested the effects on neurodegeneration. Epigallocatechin gallate (EGCG)  
185 is a polyphenol extracted from green tea and showed a strong effect in inhibiting biofilm formation by  
186 impairing curli assembly in *E. coli* (Serra et al., 2016). We confirmed that EGCG treatment  
187 completely eliminated Congo red staining signal (Figure 2D). To measure endogenous CsgA levels,  
188 we initially engineered the *csgA* locus to insert a C-terminal mCherry, but the resulted *csgA::mCherry*  
189 fusion completely blocked curli production (Figure S1B), suggesting that fusing large fluorescent  
190 proteins (~28 kDa for mCherry) with small amyloidogenic proteins (~15 kDa for CsgA) may interfere  
191 with fibril formation. We then inserted a small 3×FLAG tag at the *csgA* locus, and the resulted *K12-*  
192 *csgA::3xFLAG* strains produced normal levels of curli and formed biofilm as the wild-type K12. As  
193 expected, EGCG strongly inhibited endogenous *csgA* expression detected by the FLAG tag (Figure  
194 2D).

195 Because EGCG is also known to have neuroprotective effects in PD models (Xu et al., 2016), we  
196 set out to assess the contribution of its bacterial effects in neuroprotection. To our surprise, treating  
197 the K12 bacteria diet with EGCG alone is sufficient to create a strong inhibition of  $\alpha$ -syn-induced  
198 neurodegeneration (Figure 2E). The inhibitory effects was almost indistinguishable with animals that  
199 also received the EGCG treatment in addition to being fed with the EGCG-treated diet. This result  
200 suggests that, at least in the *C. elegans* PD model, the neuroprotective effects of EGCG may be  
201 largely due to its activities in inhibiting bacterial curli production.

202

### 203 **Bacterial curli promotes $\alpha$ -syn aggregation**

204 Because both CsgA and  $\alpha$ -syn are enriched in  $\beta$ -sheet structures, we next examined whether  
205 CsgA promotes  $\alpha$ -syn aggregation *in vivo*. First, using a transgenic strain with muscle-specific  
206 expression of  $\alpha$ -syn::YFP fusion, we found the  $\alpha$ -syn aggregation in the form of fluorescent puncta is  
207 strongly inhibited when the animals were fed with *csgA(-)* or *csgB(-)* bacteria (Figure 3A).  
208 Conversely, when the animals were fed with a uropathogenic *E. coli* strain (UTI2) that has high levels  
209 of curli production (Figure 2A), much more  $\alpha$ -syn aggregates were observed than in animals grown  
210 on wild-type K12 (Figure 3A). As expected, *csgA(-)* knockout in the UTI2 strain significantly reduced  
211 the number of the aggregates. Thus, not only curli promotes  $\alpha$ -syn aggregation but also the amount of  
212 curli consumed by the animals correlates with the severity of  $\alpha$ -syn aggregation.

213 Because the  $\alpha$ -syn::YFP fusion may not accurately reflect the aggregation pattern of  $\alpha$ -syn, we  
214 next directly stained  $\alpha$ -syn expressed pan-neuronally or specifically in DA neurons using anti- $\alpha$ -syn

215 antibodies. We found that the amount of  $\alpha$ -syn proteins detected in *aex-3p::\alpha*-syn(A53T) animals fed  
216 with *csgA(-)* bacteria was greatly reduced compared to the animals fed with wild-type K12 (Figure  
217 3B). In animals carrying the *dat-1p::\alpha*-syn(A53T) transgene and fed with wild-type K12,  $\alpha$ -syn  
218 proteins were found as discrete aggregates in both the cytoplasm and axons of DA neurons. Feeding  
219 with *csgA(-)* bacteria, however, removed most of the aggregates and led to a diffusive pattern of  $\alpha$ -  
220 syn (Figure 3C).

221 Biochemical analysis supported the immunofluorescence results. After sequentially fractionizing  
222 the lysate of animals expressing  $\alpha$ -syn::YFP in the muscle, we found that the amount of  $\alpha$ -syn::YFP  
223 was markedly reduced in the insoluble fraction (FA) in animals fed with *csgA(-)* K12 compared to the  
224 animals fed with wild-type K12 (Figure 3D). In contrast,  $\alpha$ -syn::YFP level in the high-salt soluble  
225 (RAB) and detergent soluble (RIPA) fraction did not show much difference. In animals expressing  $\alpha$ -  
226 syn(A53T) pan-neuronally, however, feeding with *csgA(-)* K12 led to the downregulation of the  
227 whole animal lysate and all three fractions (Figure 3D). This downregulation likely occurred at the  
228 protein level, because the  $\alpha$ -syn mRNA level did not show any difference in animals fed with wild-  
229 type and *csgA(-)* K12 (Figure S2A) and treatment with proteasome inhibitors, such as MG132 and  
230 Bortezomib, restored the protein level of  $\alpha$ -syn in *aex-3p::\alpha*-syn(A53T) animals fed with *csgA(-)* K12  
231 (Figure 3E). These data support that CsgA derived from the bacteria promotes the formation of  
232 insoluble  $\alpha$ -syn aggregates that are not accessible by the proteasomal machinery. Importantly,  
233 treatment with ubiquitination or proteasome inhibitors could largely block the neuroprotective effects  
234 of deleting *csgA* in the bacteria (Figure 3F). Thus, in the absence of bacterial curli, neurons were  
235 capable of handling the pro-aggregating  $\alpha$ -syn(A53T) proteins through the ubiquitination-proteasome  
236 system. Curli-induced  $\alpha$ -syn aggregation may exacerbate the proteotoxic stress and overwhelm the  
237 proteasome system, leading to neurodegeneration.

238

### 239 **CsgA colocalizes with $\alpha$ -syn in muscles and neurons**

240 We next tested whether bacteria curli can get into *C. elegans* tissues to promote  $\alpha$ -syn  
241 aggregation through cross-seeding *in vivo*. According the theory of cross-seeding (Morales et al.,  
242 2013), we hypothesizes that CsgA serves as the seed to nucleate  $\alpha$ -syn. As in the K12 strain, we  
243 engineered the *csgA* locus to fuse a C-terminal 3 $\times$ FLAG tag in the UTI2 *E. coli* strain, which produce  
244 high levels of curli, and then feed this bacteria to animals expressing  $\alpha$ -syn::YFP in the muscle. By  
245 staining the FLAG tag, we observed the colocalization of CsgA with  $\alpha$ -syn::YFP puncta (Figure 4A).  
246 Strikingly, CsgA appeared to be located in the center of the  $\alpha$ -syn::YFP aggregates, which is  
247 consistent with the notion that curli helps nucleate  $\alpha$ -syn. To avoid possible complication with the  $\alpha$ -  
248 syn::YFP fusion, we directly visualize the colocalization of  $\alpha$ -syn and CsgA through

249 immunofluorescence double staining in animals expressing  $\alpha$ -syn(A53T) in the muscle (Figure 4B).  
250 In this case, CsgA and  $\alpha$ -syn signal appeared to overlap completely.

251 Colocalization of CsgA with  $\alpha$ -syn was also observed in dopaminergic neurons of animals  
252 carrying the *dat-1p:: $\alpha$ -syn(A53T)* transgene and fed with *UTI-2-csgA-3xFLAG* bacteria (Figure 4C).  
253 Importantly, colocalization was not only found in the CEP and ADE neurons, which are adjacent to  
254 the pharynx that grinds up the bacteria, but also found in PDE neurons that are located in the posterior  
255 half of the body. Thus, the CsgA proteins appeared to be transported inside the *C. elegans* (Figure  
256 4C). Interestingly, CsgA signals were not observed in normal DA neurons that do not express  $\alpha$ -syn,  
257 suggesting that the retention of bacterial curli may also depends on  $\alpha$ -syn aggregation (Figure S3).  
258 These results support the mutual cross-seeding between CsgA and  $\alpha$ -syn.

259 As controls for the above immunofluorescence experiments, we also fed PD animals with the  
260 wild-type UTI2 bacteria without the CsgA::3xFLAG fusion and did not observe any anti-FLAG  
261 signals (Figure S4). Deconvolution were used to analyse the above imaging data to increase clarity  
262 and to remove out-of-focus light. The raw unprocessed images showed similar colocalization patterns  
263 (Figure S5).

264

### 265 **Curli promotes $\alpha$ -syn-induced mitochondrial dysfunction and energy failure**

266 We next conducted transcriptomics studies to investigate what molecular aspects of the  $\alpha$ -syn  
267 neurodegenerative pathology can be rescued by deleting CsgA in the bacteria. Through RNA  
268 sequencing, we found 1274 genes downregulated (fold change > 2; adjusted  $p < 0.05$ ) in animals  
269 expressing  $\alpha$ -syn(A53T) pan-neuronally compared to wild-type animals, when both fed with the wild-  
270 type K12. Gene ontology analysis found that genes that function in the mitochondria and genes that  
271 regulate metabolic processes and energy production were enriched in the 1274 downregulated genes,  
272 which indicated that  $\alpha$ -syn aggregation disrupted mitochondrial functions. Among these 1274 genes,  
273 168 genes were upregulated when *aex-3p:: $\alpha$ -syn(A53T)* animals were fed with *csgA(-)* K12 bacteria  
274 (Figure 5A and Table S1-2). Importantly, 84% (168/199) of the genes that were upregulated by  
275 feeding with *csgA(-)* K12 were genes downregulated by  $\alpha$ -syn(A53T), and no significant  
276 transcriptomic changes were found between the wild-type animals fed with wild-type and *csgA(-)*  
277 K12 bacteria. Thus, promoting  $\alpha$ -syn aggregation is likely the only activity of curli in the PD animals;  
278 and it does not seem to affect other aspects of normal *C. elegans* physiology.

279 Focusing on the effects of curli on the mitochondria, we confirmed the downregulation of seven  
280 mitochondrial genes (*alh-13*, *acdh-1*, *bcat-1*, *ech-6*, *hach-1*, *hpdh-1*, and *mel-32*) in PD animals and  
281 their restored expression upon feeding with *csgA(-)* bacteria using RT-qPCR (Figure 5B and S2B).  
282 Some of these genes regulate mitochondrial cellular respiration. For example, *acdh-1* (a  
283 short/branched chain acyl-CoA dehydrogenase) and *ech-6* (a short chain enoyl-CoA hydratase) are  
284 involved in mitochondrial fatty acid  $\beta$ -oxidation, and *bcat-1* codes for a branched-chain amino acid



285 (BCAA) aminotransferase that initiates the catabolism of BCAAs. Both  $\beta$ -oxidation and BCAA  
286 breakdown generate acetyl-CoA, which feeds into the tricarboxylic acid (TCA) cycle to produce  
287 NADH and FADH<sub>2</sub>, which are then supplied for the electron transport chain to produce ATP (Nolfi-  
288 Donegan et al., 2020). *hpdh-1* (a hydroxyacid-oxoacid transhydrogenase) directly functions in the  
289 TCA cycle and *mel-32* codes for a serine hydroxymethyltransferase, which is essential for  
290 maintaining mitochondrial respiration (Lucas et al., 2018). Interestingly, knockdown of *bcat-1* was  
291 found to promote neurodegeneration in PD models (Yao et al., 2018). In addition, the expression of  
292 lipid elongases (*elo-5*, *elo-6*, and *elo-9*) and acyl-coA oxidase (*acox-2* and *F08A8.4*), which are also  
293 known genetic modifiers of PD (Chen and Burgoyne, 2012; Lee et al., 2011), were downregulated in  
294 *aex-3p:: $\alpha$ -syn(A53T)* animals and recovered upon feeding with *csgA(-)* bacteria (Table S1-2).

295 To test whether the alteration in genetic programs associated with mitochondrial activities and  
296 metabolism led to defects in energy production, we measured oxygen consumption rates in *C. elegans*  
297 using the Agilent Seahorse XFe24 analyser. We found that animals expressing  $\alpha$ -syn(A53T) pan-  
298 neuronally had much lower basal and ATP-linked respiration than the wild-type animals. Feeding  
299 with *csgA(-)* bacteria strongly rescued cellular respiration (Figure 5C). These results support that  
300 CsgA-induced  $\alpha$ -syn aggregation caused mitochondrial dysfunction and energy failure, leading to  
301 neuronal cell death.

302 We also visualized mitochondrial morphology using a strain expressing *tomm-20::mcherry*  
303 fusion in the touch receptor neurons. When fed with wild-type K12, the expression of  $\alpha$ -syn(A53T)  
304 led to fragmentation of the mitochondria, whereas feeding with *csgA(-)* K12 could largely rescue the  
305 morphological defects of the mitochondria (Figure 5D). A well-known mitochondrial response to  
306 proteotoxic stress is the activation of mitoUPR (mitochondrial unfolded protein response) pathways  
307 (Anderson and Haynes, 2020). In *C. elegans*, mitochondrial stress in neurons can trigger mitoUPR in  
308 intestine through inter-tissue signalling (Zhang et al., 2018). As expected, we observed the activation  
309 of mitoUPR markers *hsp-6::GFP* and *dve-1::GFP* in the intestine of animals with pan-neuronal  
310 expression of  $\alpha$ -syn(A53T); and the mitoUPR response was not engaged when the animals were fed  
311 with *csgA(-)* bacteria (Figure 5E). As controls, we found that the mitoUPR markers were not activated  
312 by the expression of wild-type  $\alpha$ -syn and the endoplasmic reticulum (ER) UPR marker *hsp-4::GFP*  
313 were not activated by either wild-type or A53T  $\alpha$ -syn proteins (data not shown). In fact, our  
314 transcriptomic analysis found that ER UPR genes (e.g. *hsp-3*, *apy-1*, and eight others) were enriched  
315 in genes downregulated by  $\alpha$ -syn(A53T) overexpression (Table S1). Overall, our results indicate that  
316 bacterial curli is indispensable for the disruption of mitochondrial health by  $\alpha$ -syn proteotoxicity.

317

318 **Bacterial curli promotes neurodegeneration induced by diverse protein aggregates in ALS, AD,**  
319 **and HD models**

320 In addition to  $\alpha$ -syn in PD models, we also examined whether CsgA promoted the  
321 neurodegeneration caused by other protein aggregates, e.g. SOD1 in Amyotrophic lateral sclerosis  
322 (ALS), amyloid  $\beta$  in Alzheimer's disease (AD), and huntingtin in Huntington's disease (HD). Using a  
323 *C. elegans* ALS model that express human SOD1(G85R)::YFP pan-neuronally (Wang et al., 2009),  
324 we found that, when the animals were fed with *csgA(-)* K12, the perinuclear accumulation of  
325 SOD1(G85R)::YFP aggregates largely disappeared in ALM neurons and the bright discrete puncta  
326 appeared more diffused and less aggregated in the ventral nerve cord motor neurons (Figure 6A).  
327 Thus, CsgA may promote SOD1 aggregation.

328 For AD models, we employed two *C. elegans* strains that expressed A $\beta$ 1-42 either in a few pairs  
329 of sensory neurons (using *flp-6* promoter) (Melentijevic et al., 2017) or pan-neuronally (using *snb-1*  
330 promoter) (Wu et al., 2006). In the first model, we observed increased ASE neuron survival when the  
331 animals were fed with *csgA(-)* K12 instead of wild-type K12 (Figure 6B). In the second case, we  
332 observed restored butanone associative learning upon the feeding with *csgA(-)* bacteria (Figure 6C).  
333 Thus, eliminating bacteria curli could partially suppress A $\beta$ -induced neurodegeneration.

334 For HD models, we fed the animals expressing htt57-128Q::GFP fusion in the mechanosensory  
335 neurons (using *mec-3* promoter) with either wild-type or *csgA(-)* K12. The discrete perinuclear  
336 clusters of htt57-128Q::GFP signals became more diffused in animals fed with *csgA(-)* K12 and the  
337 degeneration of ALM neurons were also suppressed (Figure 6D). As functional output, we tested  
338 harsh touch sensed by the PVD neurons and found the percentage of response increased dramatically  
339 in the HD animals fed with *csgA(-)* K12, suggesting improved PVD functions (Figure 6E).  
340 Nevertheless, we did not observe significant improvement in gentle touch response mediated by ALM  
341 and PLM neurons upon feeding with *csgA(-)* K12.

342 The above data expanded the pro-neurodegenerative role of bacteria curli and suggested that  
343 CsgA may cross-seed not only  $\alpha$ -syn but also a wide range of other aggregation-prone proteins,  
344 including SOD1, A $\beta$ , and polyQ-expanded huntingtin. Targeting CsgA may be generally effective in  
345 reducing neurodegeneration in many neurodegenerative diseases.

346

### 347 **CsgA-derived amyloidogenic peptides cross-seed $\alpha$ -syn and induce neuronal death in human** 348 **cells**

349 Finally, we tested the *in vivo* cross-seeding of CsgA and  $\alpha$ -syn in human neuroblastoma SH-  
350 SY5Y cells. After transfecting the SH-SY5Y cells with plasmids expressing  $\alpha$ -syn wild-type or  
351 A53T, we treated the cells with a CsgA-derived amyloidogenic hexapeptides (N'-QYGGNN-C') or a  
352 non-amyloidogenic control (N'-QYGGNA-C') (Tukel et al., 2009). We found that the CsgA  
353 amyloidogenic peptides significantly enhanced  $\alpha$ -syn expression and aggregation in the SH-SY5Y  
354 cells (Figure 7A and B) and expression of  $\alpha$ -syn or EGFP:: $\alpha$ -syn fusion facilitated the accumulation  
355 of rhodamine-conjugated CsgA peptides (Figure 7C and S6A). In fact, without the expression of  $\alpha$ -

356 syn, the peptides cannot be retained in the SH-SY5Y cells. Thus, the cross-seeding and mutual  
357 facilitation of aggregation between CsgA and  $\alpha$ -syn observed in *C. elegans* also occurred in human  
358 cells.

359 Using the rhodamine-QYGGNN peptide and antibody staining against  $\alpha$ -syn, we directly  
360 observed the colocalization of CsgA-derived peptides with both  $\alpha$ -syn wild-type and A53T proteins in  
361 SH-SY5Y cells (Figure 7C-D and S6B). Both  $\alpha$ -syn and CsgA appeared to be enriched in the  
362 periphery of the cells.  $\alpha$ -syn(A53T) also showed stronger signal than wild-type  $\alpha$ -syn in the presence  
363 of CsgA peptides. To assess neuronal cell death, we carried out a cell viability assay on SH-SY5Y  
364 cells transfected with  $\alpha$ -syn-expressing constructs and treated with the CsgA peptides. We found that  
365 the amyloidogenic QYGGNN but not the control peptide strongly exacerbated cell death induced by  
366  $\alpha$ -syn proteins (Figure 7E). Treatment of the QYGGNN peptide alone in cells that express no  $\alpha$ -syn  
367 did not affect cell survival. Thus, bacterial curli may enhance the  $\alpha$ -syn aggregates-induced  
368 degeneration of human neurons.

369

## 370 Discussion

### 371 Genome-wide screen reveals pro-neurodegenerative factors in bacteria

372 In this study, we conducted a genome-wide screen for pro-neurodegenerative factors in bacteria  
373 and identified 38 *E. coli* genes that promote  $\alpha$ -syn-induced neurodegeneration in a *C. elegans* model  
374 of PD. The design of our screen ensured low level of false positives, since two independent PD  
375 models were used and two independent phenotypes (locomotion defects caused by motor neuron  
376 degeneration and the loss of fluorescently labelled dopaminergic neurons) were scored (Figure 1A).  
377 Nevertheless, we expect relatively high false negative rate, since our screen strategy biased towards  
378 the positive hits of the beginning rounds. Despite that, the final 38 positive *E. coli* genes clearly  
379 converged on several genetic pathways that likely play important roles in mediating bacteria-host  
380 interactions in PD pathogenesis. Besides the curli genes, *csgA* and *csgB*, which are the focus of this  
381 study, we also identified five genes involved in LPS production and assembly, three genes involved in  
382 the biosynthesis of adenosylcobalamine, two genes that code for inhibitors of eukaryotic lysozymes,  
383 six genes involved in oxidative stress response, and eight genes involved in metabolism and energy  
384 homeostasis, among others. These results not only confirmed some previous hypotheses about the gut  
385 microbiota-brain interactions in PD but also offered new insights into the process.

386 For example, intact LPS triggers innate immunity in both *C. elegans* and humans and the resulted  
387 neuroinflammatory response has detrimental effects on PD pathology (Aballey et al., 2003; Kelly et  
388 al., 2014). Consistent with this notion, we observed that the disruption of LPS assembly in *E. coli*  
389 mutants, such as *lapA(-)* and *lapB(-)*, alleviated neurodegeneration in *C. elegans*. The receptor for  
390 LPS in *C. elegans* is, however, unclear, since the presumptive Toll-like receptor signalling pathway

391 does not mediate LPS toxicity (Aballay et al., 2003). Thus, LPS may promote neurodegeneration  
392 through diverse molecule mechanisms in different organisms.

393 Deletions of *E. coli* genes (*cobS*, *btuR*, and *eutT*) involved in the biosynthesis of adenosyl-  
394 cobalamin (AdoCbl), one active form of vitamin B12, also suppressed neurodegeneration in *C.*  
395 *elegans*. Clinical studies suggested that vitamin B12 insufficiency may be a contributing factor for the  
396 cognitive impairment and rapid disease progression in PD (McCarter et al., 2019). So, our results  
397 were quite unexpected. One hypothesis is that blocking AboCbl synthesis in *E. coli* might lead to  
398 increased production of methylcobalamin (MeCbl), another form of B12 that may be beneficial for  
399 preventing neurodegeneration. An alternative hypothesis is that AboCbl-dependent metabolic  
400 pathways in *C. elegans* might promote degeneration. In either case, given that vitamin B12 is  
401 synthesized by the gut bacteria in humans, the *C. elegans* model can be instrumental to understand the  
402 roles of AdoCbl and MeCbl in the microbial regulation of neuronal health.

403 Among the other positive hits, genes (e.g. *sodA*, *yaaA*, *msrA*, and *nrfA*) that help *E. coli* cope  
404 with oxidative stress, genes (*ldhA* and *lldD*) that mediate the conversion of lactate into pyruvate, and  
405 genes (*pck* and *tpiA*) that mediate key steps in gluconeogenesis also promoted  $\alpha$ -syn-induced  
406 neurodegeneration. Although the mechanisms by which these bacterial genes regulate host  
407 neurodegeneration await further investigation, our systematic screen successfully identified several  
408 possible routes of communication between the bacteria and host neurons.

409

#### 410 **Cross-seeding between bacteria curli and pathologically aggregated proteins in neurons**

411 Cross-seeding refers to the process that oligomers composed by one type of misfolded proteins  
412 can promote the polymerization of another (Morales et al., 2013). Previous studies have observed the  
413 cross-seeding between A $\beta$  and other misfolded proteins, including prion, tau, and  $\alpha$ -syn (Mandal et  
414 al., 2006; Morales et al., 2010). Bacterial curli, made of the major subunit CsgA and the minor  
415 subunit CsgB, is a type of amyloid fibril with cross  $\beta$ -sheet structure. Since curli fibers from different  
416 bacterial species are able to cross-seed *in vitro* and facilitate multispecies biofilm formation (Zhou et  
417 al., 2012), it has been hypothesized that curli secreted by the gut bacteria may also cross-seed with A $\beta$   
418 or  $\alpha$ -syn and thus promote neurodegeneration. Direct evidence for this hypothesis was missing until  
419 recently.

420 While we are conducting this study, Sampson et al. (2020) reported the *in vitro* cross-seeding  
421 between and CsgA and  $\alpha$ -syn and showed that purified CsgA accelerates  $\alpha$ -syn fibrilization. To  
422 extend their *in vitro* studies, we directly visualized the colocalization of CsgA and  $\alpha$ -syn *in vivo* in *C.*  
423 *elegans* neurons and human neuroblastoma cells at single-cell resolution. Importantly, previous  
424 studies mostly used Congo red staining to visualize bacteria curli, which may be problematic because  
425 Congo red stains not only curli but many other types of amyloid deposition (Ho et al., 2014). In this  
426 study, we tagged CsgA with a FLAG-tag and were able to clearly demonstrate the presence of curli

427 and their colocalization with  $\alpha$ -syn inside neurons. Moreover, we also showed that the cross-seeding  
428 is bidirectional. In both *C. elegans* neurons and human SH-SY5Y cells, CsgA promoted  $\alpha$ -syn  
429 aggregation and  $\alpha$ -syn facilitated the retention of CsgA. Similar bidirectional interaction was also  
430 observed between A $\beta$  and prions and  $\alpha$ -syn (Morales et al., 2009).

431 In addition to the cross-seeding between curli and  $\alpha$ -syn, we also provided evidence to show that  
432 CsgA promoted neurodegeneration caused by the aggregation of A $\beta$ , SOD1, and polyQ-expanded  
433 Huntingtin in *C. elegans* models of AD, ALS, and HD, respectively. Therefore, the bacteria-secreted  
434 curli may have detrimental effects in a range of neurodegenerative disorders. Targeting curli  
435 production in the gut may represent a general therapeutic approach to prevent or slow down the  
436 progression of the protein aggregation diseases. In this study, we showed that blocking curli  
437 production in bacteria using EGCG, a green tea extract, has remarkable effects in preventing  
438 neurodegeneration, suggesting that pharmacological inhibition of curli may be an effective treatment  
439 for PD and likely other neurodegenerative diseases. It is encouraging that in a recent study using a  
440 mice PD model, Sampson *et al.* (2020) found that colonization of mouse gut with curli-producing *E.*  
441 *coli* also promoted  $\alpha$ -syn pathology in the brain and exacerbated motor impairment. Thus, the effects  
442 of curli on neurodegeneration appeared to be consistent across different disease models in diverse  
443 organisms.

444

#### 445 **Bacteria-host interactions regulate neuronal mitochondrial functions**

446 Mitochondrial dysfunction is a hallmark of PD pathogenesis and  $\alpha$ -syn aggregation and  
447 mitochondrial damage exacerbate each other through a vicious cycle (Poewe et al., 2017). Consistent  
448 with this idea, our transcriptomic studies found that  $\alpha$ -syn(A53T) overexpression downregulated  
449 genes that function in mitochondria, lipid metabolism, and ATP production. Eliminating bacterial  
450 curli restored the expression of a subset of these genes, which may be the key regulatory points in the  
451 metabolic network disrupted in PD. For example, mitochondrial genes *acdH-1*, *bcat-1*, *ech-6*, and  
452 *hpdh-1*, which code for various enzymes critical in BCAA catabolism, fatty acid  $\beta$ -oxidation, or TCA  
453 cycle, were reactivated in PD animals fed with the *csgA(-)* bacteria. This correction in transcriptional  
454 program is accompanied by restored mitochondrial morphology, blocked mitoUPR activation, and  
455 revived cellular respiration. Thus, removing curli from the bacteria reduced  $\alpha$ -syn proteotoxicity and  
456 rescued neurons from mitochondrial dysfunction and energy failure, which may be the key in  
457 preventing neuronal death.

458 Supporting the regulation of key metabolic genes in PD, *bcat-1* was recently identified as a PD-  
459 associated gene (Yao et al., 2018). Human BCAT-1 is highly expressed in the substantia nigra of  
460 healthy individuals, and its expression is significantly diminished in PD patients; knockdown of *bcat-*  
461 *1* in *C. elegans* neurons recapitulated aging phenotypes and enhanced  $\alpha$ -syn-induced  
462 neurodegeneration. Since BCAT-1 is the aminotransferase that catalyzes the initial step of BCAA

463 breakdown, downregulation of *bcat-1* leads to not only reduced energy production but also increased  
464 BCAA levels, which appeared to correlate with disease severity in PD patients (Luan et al., 2015). In  
465 another example, impaired fatty acid  $\beta$ -oxidation is associated with the energy crisis in PD and the  
466 levels of short chain 3-hydroxyacyl-CoA dehydrogenase (SCHAD), a key enzyme in  $\beta$ -oxidation, are  
467 significantly reduced in the ventral midbrain of both PD mice and PD patients (Przedborski et al.,  
468 2004). Overexpression of SCHAD mitigates the impairment of oxidative phosphorylation and ATP  
469 production in PD models (Tieu et al., 2004). Our work found that *acdH-1* (a short/branched chain  
470 acyl-CoA dehydrogenase, homolog of human ACADSB) and *ech-6* (a short chain enoyl-CoA  
471 hydratase, homolog of human ECHS1), two other essential enzymes in  $\beta$ -oxidation, were also  
472 downregulated in PD but recovered after eliminating bacteria curli. Restoration of the expression of  
473 these metabolic genes may be critical for restoring mitochondrial respiration and energy production at  
474 the cellular level.

475 Furthermore, we found that in the absence of curli, the reduced  $\alpha$ -syn aggregation could be coped  
476 with by the ubiquitination-proteasome system, which protect the neurons from toxic oligomers-  
477 induced mitochondrial dysfunction and from cell death. In fact, our transcriptomic analysis found that  
478 many proteolytic genes (e.g. aspartyl protease *asp-8*, prolyl carboxypeptidase *pcp-4*, metalloprotease  
479 *nep-22*, etc) were downregulated in PD animals and recovered when feeding with *csgA(-)* bacteria  
480 (Figure 5A and Table S1-2). The reactivation of the proteolytic machineries after removing curli may  
481 have allowed the neurons to curb  $\alpha$ -syn aggregation and maintain the oligomers at low levels.  
482 Nevertheless, only 168 (13%) of the 1274 genes downregulated in PD animals were rescued after  
483 deleting curli in the *E. coli*, suggesting that many transcriptional change may still be induced by low  
484 levels of  $\alpha$ -syn aggregates independent of curli.

485

## 486 **STAR Methods**

### 487 ❖ *C. elegans* Strains

488 *Caenorhabditis elegans* wild-type (N2) and mutant strains were maintained at 20°C as previously  
489 described (Brenner, 1974). PD-related strains UM{Schneider, 2012 #60}9 *unkIs11[dat-1p::GFP]*,  
490 UM10 *unkIs7[aex-3p:: $\alpha$ -syn(A53T), dat-1p::gfp]*, UM11 *unkIs8[aex-3p:: $\alpha$ -syn(WT), dat-1p::gfp]*,  
491 UM3 *unkIs10 [dat-1p:: $\alpha$ -syn(WT), dat-1p::gfp]*, and UM6 *unkIs9 [dat-1p:: $\alpha$ -syn(A53T), dat-1p::gfp]*  
492 were generous gifts from Garry Wong at the University of Macau. ALS strains carrying the  
493 transgenes *snb-1p::SOD1(G85R)::YFP* and *snb-1p::SOD1(WT)::YFP* were kindly provided by Jiou  
494 Wang at Johns Hopkins University. The AD strains carrying *sesIs25 [flp-6p::Abeta1-42; gcy-*  
495 *5p::GFP; rol-6]* were kindly provided by Monica Driscoll at Rutgers University. CGZ512 *dpy-*  
496 *5(e907); unkEx109[myo-3p:: $\alpha$ -syn(A53T); dpy-5(+)]* were generated in this study through  
497 microinjections. The *myo-3p:: $\alpha$ -syn(A53T)* constructs were created by swapping the *dat-1* promoter  
498 in the *dat-1p:: $\alpha$ -syn(A53T)* construct provided by Garry Wong with a 2.5 kb *myo-3* promoter.

499 Another PD strain NL5901 *pkIs2386[unc-54p:: $\alpha$ -synuclein::YFP; unc-119(+)]*, the AD strain  
500 CL2355 *smg-1(cc546); dvIs50[pCL45 (snb-1::A $\beta$ 1-42::3'UTR(long); mtl-2:: GFP]*, the HD strain  
501 ID5 *igIs5 [mec-3p::htt57-128Q::GFP; lin-15(+)]*, the mitochondrial marker CLP215 *twnEx8[mec-*  
502 *7p::tomm-20::mCherry; myo-2p::GFP]*, and the mitoUPR reporters SJ4100 *zcls13[hsp-6::GFP]* and  
503 SJ4197 *zcls39 [dve-1p::dve-1::GFP]* were provided by the *Caenorhabditis* Genetics Center.

504

### 505 ❖ Keio library screens, *E. coli* genetic engineering, and Congo red staining

506 The Keio library (Baba et al., 2006) were purchased from the Dharmacon (Colorado, United  
507 States). *E. coli* knockout clones from the library were grown overnight at 37°C in LB medium with 50  
508  $\mu$ g/ml kanamycin in 96-deep well plates. 20  $\mu$ L of the overnight culture was seeded onto NGM agar-  
509 containing 96-well plates. For locomotion screens, about 20 synchronized first-stage larva (L1) of the  
510 UM10 strain were added into each well and the animals were grown for 48 hours at 20°C before  
511 scored for the penetrance of non-Unc phenotype at the L4 stage. *E. coli* mutants that caused at least  
512 25% of the animals in the well to be non-Unc were considered positive hits. Animals fed with the  
513 parental wild-type K12 (BW25113) served as the negative control. For the ADE survival screen,  
514 bacterial culture was seeded on a 5 cm petri dish containing NGM and about 20 L1 animals of either  
515 UM10 or UM6 strains were added to the plate. Animals were screened as day-two adults for the  
516 percentage of animals showing two ADE neurons that clearly expressed GFP and showed normal cell  
517 morphology.

518 To delete *csgA* gene in the uropathogenic *E. coli* strain UTI2 (provided by Dr. Aixin Yan at the  
519 University of Hong Kong) and insert DNA fragment coding the 3xFLAG tag in the endogenous *csgA*  
520 locus in K12 and UTI2, we performed lambda red recombineering using a previously described  
521 method (Datsenko and Wanner, 2000). For deleting *csgA*, we used primers carrying ~50 bp *csgA*-

522 flanking sequences to amplify a chloramphenicol (Cm) resistance gene. For inserting 3xFLAG, we  
523 amplified the Cm-resistance gene using primers containing both the FLAG tag and flanking  
524 sequences. Primer sequences can be found in the supplemental materials. *E. coli* K12 or UTI2  
525 transformed with the helper plasmids pKD46 and pTNT was grown until OD600 reaches 0.4-0.6 in  
526 the presence of L-Arabinose at 30°C and washed with ice-cold 10% glycerol to make  
527 electrocompetent cells, which were then mixed with the purified PCR products and electroporated at  
528 1.8 kV. Cells were then plated on LB agar plates containing Cm. Colonies were verified by colony  
529 PCR and Sanger sequencing.

530 For Congo red staining, the indicator plates were made of YESCA (1 g yeast extract, 10 g  
531 casamino acids, and 20 g agar per liter) media with 50 µg/mL Congo Red and 10 µg/mL Coomassie  
532 Brilliant Blue. 10 µl of overnight bacteria culture was seeded onto plates and cultured at 25°C for 48 h  
533 prior to assessing the curli production.

534

### 535 ❖ Biochemical analysis

536 To measure the level of  $\alpha$ -syn in high-salt soluble, detergent soluble and insoluble fractions,  
537 sequential fractionation was performed according to previously described methods (Fatouros et al.,  
538 2012). Briefly, synchronized worms were washed off NGM plates with M9 buffer. Dead animals and  
539 bacteria were removed by flotation on a 30% sucrose solution. The entire extraction procedure was  
540 carried out on ice and centrifugation steps were performed at 4°C except for the last step with 30% FA,  
541 which was performed at room temperature. To extract different fractions, worm pellets were directly  
542 resuspended in an equal amount (w/v) of high-salt RAB buffer [100 mM 2-(N-morpholino)  
543 ethanesulfonic acid (MES), 1 mM EGTA, 0.5 mM MgSO<sub>4</sub>, 20 mM NaF] and then were lysed by  
544 sonication (6 × 10 s, 10 s break). Homogenates were centrifuged at 40,000×g for 40 min. The  
545 supernatant constitutes the RAB fraction. The pellet was re-extracted with 1 M sucrose in RAB buffer  
546 and centrifuged for 20 min at 40,000×g, and the supernatant was discarded. The pellet was then  
547 extracted with RIPA buffer (150 mM NaCl, 1% Nonidet P-40, 0.5% deoxycholate, 0.1% SDS, 50 mM  
548 Tris, pH 8.0) and centrifuged at 40,000×g for 20 min. The supernatant is the RIPA fraction. The pellet,  
549 after a brief washing with RIPA buffer, was extracted with 30% FA and centrifuged at 13,000×g for 15  
550 min. The supernatant is the FA fraction. All buffers contained the Roche cOmplete Protease Inhibitor  
551 cocktail and 0.5 mM PMSF (Sigma-Aldrich). The pH of FA fraction was adjusted by 5M NaOH. The  
552 RAB, RIPA and FA fraction were loaded to SDS-PAGE gel and probed with anti- $\alpha$ -synuclein (ab27766,  
553 Abcam; 1:1000 dilution) and anti-tubulin (ab76286, Abcam; 1:2000 dilution) antibodies.

554

### 555 ❖ RNA-seq and RT-qPCR

556 Total RNA from *C. elegans* was extracted using TRIzol reagent (Thermo Fisher). Samples were  
557 sent to BGI (Beijing Genome Institutes) Hong Kong for standard library construction and pair-end



558 sequencing. Around 20 million reads were obtained for each sample and the reads were aligned to the  
559 *C. elegans* genome (WS235) using STAR 2.7. To identify genes differentially expressed, the transcript  
560 counts were analyzed using DESeq2, and genes with false discovery rate–corrected *p* values (*q*  
561 values) below 0.05 and fold change above 2 or below 0.5 were identified. Gene enrichment analysis  
562 was then performed on the genes showing significant expression change using the DAVID functional  
563 annotation tool 6.8. The raw RNA-seq data can be accessed through  
564 <https://www.ncbi.nlm.nih.gov/geo/query/acc.cgi?acc=GSE169204> in GEO database.

565 For transcriptional analysis, cDNA was reversed transcribed from total RNA using PrimeScript  
566 RT reagent kit (Takara) from synchronized L4 animals. Quantitative real-time PCR was performed  
567 using a TB Green Premix Ex Taq kit (Takara) in CFX96 real-time PCR machine (BioRad). Values  
568 were normalized to the internal control *tba-1*. All data shown represent the average of three  
569 biologically independent replicates. The qPCR primers are listed in supplementary [Table S3](#).

570

#### 571 ❖ **Antibody staining and fluorescent imaging**

572 The antibody staining was performed using the Ruvkun protocol previously described (Finney  
573 and Ruvkun, 1990). *C. elegans* were fixed in fixation buffer with 2% formaldehyde in liquid nitrogen  
574 and several freeze-and-thaw cycles were carried out to break the cuticle. To detect synuclein and  
575 FLAG simultaneously, the mouse monoclonal anti- $\alpha$ -syn (ab27766, Abcam; 1:500 dilution) and  
576 rabbit polyclonal anti-FLAG antibodies (F7425, Sigma; 1:500 dilution) were added to the worm  
577 suspension and the incubation were carried out overnight on a rotating platform. Alexa 488-  
578 conjugated goat anti-mouse IgG antibody (115-545-003, Jackson Lab; 1:1000 dilution) and  
579 rhodamine-conjugated goat anti-rabbit IgG antibody (111-025-003, Jackson Lab; 1:1000) were used  
580 as secondary antibodies. After washing, worms were mounted on agarose pads for visualization.

581 Fluorescent imaging was done on a Leica DMi8 inverted microscope equipped with a  
582 Leica DFC7000 GT or K5 monochrome camera. Measurements were made using the Leica  
583 Application Suite X (3.7.0.20979) software. The Leica THUNDER deconvolution imaging system  
584 was used to process the colocalization images to increase the clarity of the pictures and remove out-  
585 of-focus light. The raw images without processing can be found in the supplemental materials.

586

#### 587 ❖ **Human cell culture, transfection, and cell viability assay**

588 Human neuroblastoma SH-SY5Y cells were maintained in DMEM supplemented with Fetal  
589 Bovine Serum (10% v/v), penicillin (100 IU/mL) and streptomycin (100  $\mu$ g/mL) in humidified 5%  
590 CO<sub>2</sub> at 37°C. The plasmids pHM6- $\alpha$ -syn(WT) (#40824), pHM6- $\alpha$ -syn(A53T) (#40825), EGFP- $\alpha$ -  
591 syn(WT) (#40822), EGFP- $\alpha$ -syn(A53T) (#40823) used for transfection were obtained from Addgene.  
592 0.5  $\mu$ g DNA was combined with lipofectamine reagent (Invitrogen Inc., USA) for 30 min in serum-  
593 free DMEM medium and the transfection mixture was incubated with the cells for 6 h. The DMEM

594 medium containing 20% FBS and synthetic peptides (QYGGNN and QYGGNA synthesized by  
595 Ontores Biotechnology, Shanghai, China) were then added to the cells without removing the  
596 transfection mixture.

597 For staining of the SH-SY5Y cells, the cells were seeded on coverslip coated with poly-D-lysine  
598 and then transfected and treated with peptides. Cells were then fixed in 4% paraformaldehyde, washed  
599 with PBST, blocked in 4% BSA blocking solution, and then stained with anti- $\alpha$ -syn mouse  
600 monoclonal antibody (ab27766, Abcam) overnight. After washing with PBST for 3 times, cells on the  
601 coverslip were incubated with FITC-conjugated goat-anti-mouse secondary antibody diluted 1:5000  
602 in blocking solution. After washing, the coverslip was mounted and imaged. The fluorescence  
603 intensity was analysed using ImageJ (Schneider et al., 2012) and corrected total cell fluorescence  
604 (CTCF) was calculated as  $CTCF = \text{Integrated Intensity} - (\text{Area of selected cell} \times \text{Mean background}$   
605  $\text{fluorescence})$ .

606 Cell viability was determined using the cell counting kit 8 (CCK-8, Abcam). Transfected  $\alpha$ -syn-  
607 overexpressing SH-SY5Y cells were cultured with or without synthetic peptides in 96-well plates at a  
608 density of  $1 \times 10^4$  cells/well and grown for 24 h. 10  $\mu$ L of CCK-8 solution was added to each well and  
609 the absorbance was measured at 460 nm on a plate reader (SpectraFluor, Tecan) after 1 h.

610

#### 611 ❖ *C. elegans* behavioral assays and statistical analysis

612 The basal slowing response assay was performed according to previous methods (Sawin et al.,  
613 2000). Animals were grown from eggs on different bacteria diet. Well-fed young adults were  
614 transferred to unseeded 6 cm NGM plate or plates with regular OP50. Worms were allowed to  
615 acclimate to the assay plates for 5 minutes, and then the number of body bends/20 seconds was  
616 counted for each animal. For diet switching assays, worms were washed with M9 twice and then  
617 incubated in M9 with ampicillin and kanamycin for 1 hour before the switch to remove residual  
618 bacteria on the surface. For the harsh touch assays, the anterior half of the animal was touched by a  
619 platinum wire (20.3  $\mu$ m in diameter, THOMAS) in a top-down manner. Each worm was touched 5  
620 times with a 2-minutes inter-trial interval. A positive touch response resulted in animals backing away  
621 from the touch.

622 The butanone associative learning assay was performed according to previous methods  
623 (Kauffman et al., 2011). Young adults were washed in M9 and collected by gravity sedimentation in a  
624 15 mL conical tube to remove bacteria. Some of the animals were transferred immediately to the  
625 chemotaxis plate for assaying for the naïve condition. The rest was starved in M9 for 1h. After the  
626 starvation, animals were conditioned for 1h in a OP50 seeded NGM plate with 2  $\mu$ L streaks of 10%  
627 butanone diluted in absolute ethanol on the lid. The conditioned worms were washed with M9 and  
628 transferred to the chemotaxis plate. For the chemotaxis assay, 10 cm unseeded NGM plates were used  
629 and three circles (1 cm in diameter of 1 cm) on the bottom and both sides of the plate were marked.

630 Animals were placed onto the bottom spot. 1  $\mu$ L of 1 M sodium azide and 1  $\mu$ L of 0.01% of butanone  
631 were added onto the left spot, and sodium azide and pure ethanol control were added onto the right  
632 spot. After one hour, the number of worms located in the butanone and ethanol spots, as well as at the  
633 original bottom spots were counted. Chemotaxis index (CI) and Learning index (LI) were calculated  
634 as Chemotaxis index (CI):  $[N(\text{butanone}) - N(\text{ethanol})] / [Total - N(\text{origin})]$ ; Learning index (LI):  $CI$   
635  $(\text{butanone}) - CI(\text{naïve})$ . Each chemotaxis assay was performed in technical triplicate and contained  
636 about 200–400 worms. Each bacteria diet treatment was performed in three biological replicates.

637 For mitochondrial cellular respiration assay, oxygen consumption rate (OCR) was measured  
638 using the Agilent Seahorse XFe24 technology (Luz et al., 2015). Briefly, the sensor cartridges were  
639 hydrated in Seahorse calibration buffer at 25°C one night before the experiment. Day-one adults were  
640 washed with complete K-medium and suspended in 525  $\mu$ L of unbuffered EPA water. About 50-100  
641 animals were added into each well of the Agilent Seahorse microplate. To achieve the equivalent  
642 volume after compound injection, we loaded 75  $\mu$ L of 160  $\mu$ M DCCD (8 $\times$ ), 225  $\mu$ M FCCP (9 $\times$   
643 concentrated) and 100 mM sodium azide (10 $\times$ ) for Port A, B and C. The basal respiration was  
644 measured first in every well, followed by injection of FCCP in half of the wells to uncouple  
645 mitochondria or DCCD in the other half of the wells to inhibit ATP synthesis. The sodium azide was  
646 injected at the end of the assay in every well to completely block mitochondrial respiration. The  
647 number of measurements for basal respiration, DCCD response, FCCP response and sodium azide  
648 response were set to 8, 14, 8 and 4, respectively. All respiration parameters were normalized to the  
649 number of animals per well. ATP-linked respiration is calculated by subtracting DCCD response from  
650 the basal OCR. Non-mitochondrial respiration is defined as the OCR after the azide treatment.

651 All quantitative data were shown as mean  $\pm$  SD. For statistical analysis, we used one-way  
652 ANOVA followed by a Tukey HSD post-hoc test to compare different treatments in a multiple  
653 comparison. Two-tailed Student's t-test was used to compare two groups. Differences were  
654 considered significant at  $p < 0.05$ . Double asterisks in figures indicate  $p < 0.01$ . All statistical analysis  
655 was carried out using GraphPad Prism 8.0 software (GraphPad Software, San Diego, CA, USA).

656

## 657 **Acknowledgements**

658 We thank Garry Wong, Jiou Wang, and Monica Driscoll for sharing strains. We also thank Dr.  
659 Aixin Yan, Dr. Jetty Lee, and Prof. Xiang Li at the University of Hong Kong for sharing equipment  
660 and reagents. Some strains used in this study were provided by the Caenorhabditis Genetics Center,  
661 which is funded by the NIH Office of Research Infrastructure Programs (P40 OD010440). This work  
662 was supported by grants from the Research Grant Council of Hong Kong (ECS 27104219 and CRF  
663 C7026-20G to C.Z.), the Food and Health Bureau of Hong Kong (HMRF 07183186 to C.Z.), and the  
664 University of Hong Kong (seed fund 201910159087 to C.Z.).

665

666

## 667 **Author Contributions**

668 C.W. performed all experiments with technical help from C.Z. in microinjection. C.Y.L and F.M.  
669 performed bioinformatic analysis on the RNA-seq data. C.Z. and C.W. prepared the figures and wrote  
670 the paper. C.Z. conceived the project, secured the funding, and supervised the experiments.

671

## 672 **References**

- 673 Aballay, A., Drenkard, E., Hilbun, L.R., and Ausubel, F.M. (2003). *Caenorhabditis elegans*  
674 innate immune response triggered by *Salmonella enterica* requires intact LPS and is mediated  
675 by a MAPK signaling pathway. *Curr Biol* 13, 47-52.
- 676 Anderson, N.S., and Haynes, C.M. (2020). Folding the Mitochondrial UPR into the  
677 Integrated Stress Response. *Trends Cell Biol* 30, 428-439.
- 678 Baba, T., Ara, T., Hasegawa, M., Takai, Y., Okumura, Y., Baba, M., Datsenko, K.A., Tomita,  
679 M., Wanner, B.L., and Mori, H. (2006). Construction of *Escherichia coli* K-12 in-frame,  
680 single-gene knockout mutants: the Keio collection. *Mol Syst Biol* 2, 2006 0008.
- 681 Barichella, M., Severgnini, M., Cilia, R., Cassani, E., Bolliri, C., Caronni, S., Ferri, V.,  
682 Canello, R., Ceccarani, C., Faierman, S., *et al.* (2019). Unraveling gut microbiota in  
683 Parkinson's disease and atypical parkinsonism. *Mov Disord* 34, 396-405.
- 684 Brenner, S. (1974). The genetics of *Caenorhabditis elegans*. *Genetics* 77, 71-94.
- 685 Cattaneo, A., Cattane, N., Galluzzi, S., Provasi, S., Lopizzo, N., Festari, C., Ferrari, C.,  
686 Guerra, U.P., Paghera, B., Muscio, C., *et al.* (2017). Association of brain amyloidosis with  
687 pro-inflammatory gut bacterial taxa and peripheral inflammation markers in cognitively  
688 impaired elderly. *Neurobiol Aging* 49, 60-68.
- 689 Chen, X., and Burgoyne, R.D. (2012). Identification of common genetic modifiers of  
690 neurodegenerative diseases from an integrative analysis of diverse genetic screens in model  
691 organisms. *BMC Genomics* 13, 71.
- 692 Datsenko, K.A., and Wanner, B.L. (2000). One-step inactivation of chromosomal genes in  
693 *Escherichia coli* K-12 using PCR products. *Proc Natl Acad Sci U S A* 97, 6640-6645.
- 694 Douglas, P.M., and Dillin, A. (2010). Protein homeostasis and aging in neurodegeneration. *J*  
695 *Cell Biol* 190, 719-729.
- 696 Evans, M.L., and Chapman, M.R. (2014). Curli biogenesis: order out of disorder. *Biochim*  
697 *Biophys Acta* 1843, 1551-1558.
- 698 Fatouros, C., Pir, G.J., Biernat, J., Koushika, S.P., Mandelkow, E., Mandelkow, E.M.,  
699 Schmidt, E., and Baumeister, R. (2012). Inhibition of tau aggregation in a novel  
700 *Caenorhabditis elegans* model of tauopathy mitigates proteotoxicity. *Hum Mol Genet* 21,  
701 3587-3603.
- 702 Finney, M., and Ruvkun, G. (1990). The *unc-86* gene product couples cell lineage and cell  
703 identity in *C. elegans*. *Cell* 63, 895-905.
- 704 Harach, T., Marungruang, N., Duthilleul, N., Cheatham, V., Mc Coy, K.D., Frisoni, G.,  
705 Neher, J.J., Fak, F., Jucker, M., Lasser, T., *et al.* (2017). Reduction of Abeta amyloid  
706 pathology in APPPS1 transgenic mice in the absence of gut microbiota. *Sci Rep* 7, 41802.
- 707 Ho, C.Y., Troncoso, J.C., Knox, D., Stark, W., and Eberhart, C.G. (2014). Beta-amyloid,  
708 phospho-tau and alpha-synuclein deposits similar to those in the brain are not identified in the  
709 eyes of Alzheimer's and Parkinson's disease patients. *Brain Pathol* 24, 25-32.
- 710 Hopfner, F., Kunstner, A., Muller, S.H., Kunzel, S., Zeuner, K.E., Margraf, N.G., Deuschl,  
711 G., Baines, J.F., and Kuhlenbaumer, G. (2017). Gut microbiota in Parkinson disease in a  
712 northern German cohort. *Brain Res* 1667, 41-45.

713 Kauffman, A., Parsons, L., Stein, G., Wills, A., Kaletsky, R., and Murphy, C. (2011). *C.*  
714 *elegans* positive butanone learning, short-term, and long-term associative memory assays. *J*  
715 *Vis Exp*.

716 Kelly, L.P., Carvey, P.M., Keshavarzian, A., Shannon, K.M., Shaikh, M., Bakay, R.A., and  
717 Kordower, J.H. (2014). Progression of intestinal permeability changes and alpha-synuclein  
718 expression in a mouse model of Parkinson's disease. *Mov Disord* 29, 999-1009.

719 Lakso, M., Vartiainen, S., Moilanen, A.M., Sirvio, J., Thomas, J.H., Nass, R., Blakely, R.D.,  
720 and Wong, G. (2003). Dopaminergic neuronal loss and motor deficits in *Caenorhabditis*  
721 *elegans* overexpressing human alpha-synuclein. *J Neurochem* 86, 165-172.

722 Lee, Y.J., Wang, S., Slone, S.R., Yacoubian, T.A., and Witt, S.N. (2011). Defects in very  
723 long chain fatty acid synthesis enhance alpha-synuclein toxicity in a yeast model of  
724 Parkinson's disease. *PLoS One* 6, e15946.

725 Luan, H., Liu, L.F., Tang, Z., Zhang, M., Chua, K.K., Song, J.X., Mok, V.C., Li, M., and Cai,  
726 Z. (2015). Comprehensive urinary metabolomic profiling and identification of potential  
727 noninvasive marker for idiopathic Parkinson's disease. *Sci Rep* 5, 13888.

728 Lucas, S., Chen, G., Aras, S., and Wang, J. (2018). Serine catabolism is essential to maintain  
729 mitochondrial respiration in mammalian cells. *Life Sci Alliance* 1, e201800036.

730 Luz, A.L., Rooney, J.P., Kubik, L.L., Gonzalez, C.P., Song, D.H., and Meyer, J.N. (2015).  
731 Mitochondrial Morphology and Fundamental Parameters of the Mitochondrial Respiratory  
732 Chain Are Altered in *Caenorhabditis elegans* Strains Deficient in Mitochondrial Dynamics  
733 and Homeostasis Processes. *PLoS One* 10, e0130940.

734 Mandal, P.K., Pettegrew, J.W., Masliah, E., Hamilton, R.L., and Mandal, R. (2006).  
735 Interaction between Abeta peptide and alpha synuclein: molecular mechanisms in  
736 overlapping pathology of Alzheimer's and Parkinson's in dementia with Lewy body disease.  
737 *Neurochem Res* 31, 1153-1162.

738 McCarter, S.J., Teigen, L.M., McCarter, A.R., Benarroch, E.E., St Louis, E.K., and Savica,  
739 R. (2019). Low Vitamin B12 and Parkinson Disease: Potential Link to Reduced Cholinergic  
740 Transmission and Severity of Disease. *Mayo Clin Proc* 94, 757-762.

741 Melentijevic, I., Toth, M.L., Arnold, M.L., Guasp, R.J., Harinath, G., Nguyen, K.C., Taub,  
742 D., Parker, J.A., Neri, C., Gabel, C.V., *et al.* (2017). *C. elegans* neurons jettison protein  
743 aggregates and mitochondria under neurotoxic stress. *Nature* 542, 367-371.

744 Morales, R., Estrada, L.D., Diaz-Espinoza, R., Morales-Scheihing, D., Jara, M.C., Castilla, J.,  
745 and Soto, C. (2010). Molecular cross talk between misfolded proteins in animal models of  
746 Alzheimer's and prion diseases. *J Neurosci* 30, 4528-4535.

747 Morales, R., Green, K.M., and Soto, C. (2009). Cross currents in protein misfolding  
748 disorders: interactions and therapy. *CNS Neurol Disord Drug Targets* 8, 363-371.

749 Morales, R., Moreno-Gonzalez, I., and Soto, C. (2013). Cross-seeding of misfolded proteins:  
750 implications for etiology and pathogenesis of protein misfolding diseases. *PLoS Pathog* 9,  
751 e1003537.

752 Nolfi-Donagan, D., Braganza, A., and Shiva, S. (2020). Mitochondrial electron transport  
753 chain: Oxidative phosphorylation, oxidant production, and methods of measurement. *Redox*  
754 *Biol* 37, 101674.

755 Poewe, W., Seppi, K., Tanner, C.M., Halliday, G.M., Brundin, P., Volkman, J., Schrag,  
756 A.E., and Lang, A.E. (2017). Parkinson disease. *Nat Rev Dis Primers* 3, 17013.

757 Przedborski, S., Tieu, K., Perier, C., and Vila, M. (2004). MPTP as a mitochondrial  
758 neurotoxic model of Parkinson's disease. *J Bioenerg Biomembr* 36, 375-379.

759 Quigley, E.M. (1996). Gastrointestinal dysfunction in Parkinson's disease. *Semin Neurol* 16,  
760 245-250.

761 Quigley, E.M.M. (2017). Microbiota-Brain-Gut Axis and Neurodegenerative Diseases. *Curr*  
762 *Neurol Neurosci Rep* 17, 94.

763 Sampson, T.R., Challis, C., Jain, N., Moiseyenko, A., Ladinsky, M.S., Shastri, G.G., Thron,  
764 T., Needham, B.D., Horvath, I., Debelius, J.W., *et al.* (2020). A gut bacterial amyloid  
765 promotes alpha-synuclein aggregation and motor impairment in mice. *Elife* 9.  
766 Sampson, T.R., Debelius, J.W., Thron, T., Janssen, S., Shastri, G.G., Ilhan, Z.E., Challis, C.,  
767 Schretter, C.E., Rocha, S., Gradinaru, V., *et al.* (2016). Gut Microbiota Regulate Motor  
768 Deficits and Neuroinflammation in a Model of Parkinson's Disease. *Cell* 167, 1469-1480  
769 e1412.  
770 Sawin, E.R., Ranganathan, R., and Horvitz, H.R. (2000). *C. elegans* locomotory rate is  
771 modulated by the environment through a dopaminergic pathway and by experience through a  
772 serotonergic pathway. *Neuron* 26, 619-631.  
773 Schneider, C.A., Rasband, W.S., and Eliceiri, K.W. (2012). NIH Image to ImageJ: 25 years  
774 of image analysis. *Nat Methods* 9, 671-675.  
775 Serra, D.O., Mika, F., Richter, A.M., and Hengge, R. (2016). The green tea polyphenol  
776 EGCG inhibits *E. coli* biofilm formation by impairing amyloid curli fibre assembly and  
777 downregulating the biofilm regulator CsgD via the sigma(E) -dependent sRNA RybB. *Mol*  
778 *Microbiol* 101, 136-151.  
779 Smith, D.R., Price, J.E., Burby, P.E., Blanco, L.P., Chamberlain, J., and Chapman, M.R.  
780 (2017). The Production of Curli Amyloid Fibers Is Deeply Integrated into the Biology of  
781 *Escherichia coli*. *Biomolecules* 7.  
782 Stefanis, L. (2012). alpha-Synuclein in Parkinson's disease. *Cold Spring Harb Perspect Med*  
783 2, a009399.  
784 Tan, A.H., Mahadeva, S., Marras, C., Thalha, A.M., Kiew, C.K., Yeat, C.M., Ng, S.W., Ang,  
785 S.P., Chow, S.K., Loke, M.F., *et al.* (2015). *Helicobacter pylori* infection is associated with  
786 worse severity of Parkinson's disease. *Parkinsonism Relat Disord* 21, 221-225.  
787 Tieu, K., Perier, C., Vila, M., Caspersen, C., Zhang, H.P., Teismann, P., Jackson-Lewis, V.,  
788 Stern, D.M., Yan, S.D., and Przedborski, S. (2004). L-3-hydroxyacyl-CoA dehydrogenase II  
789 protects in a model of Parkinson's disease. *Ann Neurol* 56, 51-60.  
790 Tukel, C., Wilson, R.P., Nishimori, J.H., Pezeshki, M., Chromy, B.A., and Baumler, A.J.  
791 (2009). Responses to amyloids of microbial and host origin are mediated through toll-like  
792 receptor 2. *Cell Host Microbe* 6, 45-53.  
793 Wang, J., Farr, G.W., Hall, D.H., Li, F., Furtak, K., Dreier, L., and Horwich, A.L. (2009). An  
794 ALS-linked mutant SOD1 produces a locomotor defect associated with aggregation and  
795 synaptic dysfunction when expressed in neurons of *Caenorhabditis elegans*. *PLoS Genet* 5,  
796 e1000350.  
797 Watson, E., MacNeil, L.T., Ritter, A.D., Yilmaz, L.S., Rosebrock, A.P., Caudy, A.A., and  
798 Walhout, A.J. (2014). Interspecies systems biology uncovers metabolites affecting *C. elegans*  
799 gene expression and life history traits. *Cell* 156, 759-770.  
800 Wu, Y., Wu, Z., Butko, P., Christen, Y., Lambert, M.P., Klein, W.L., Link, C.D., and Luo, Y.  
801 (2006). Amyloid-beta-induced pathological behaviors are suppressed by Ginkgo biloba  
802 extract EGb 761 and ginkgolides in transgenic *Caenorhabditis elegans*. *J Neurosci* 26, 13102-  
803 13113.  
804 Xu, Y., Zhang, Y., Quan, Z., Wong, W., Guo, J., Zhang, R., Yang, Q., Dai, R., McGeer, P.L.,  
805 and Qing, H. (2016). Epigallocatechin Gallate (EGCG) Inhibits Alpha-Synuclein  
806 Aggregation: A Potential Agent for Parkinson's Disease. *Neurochem Res* 41, 2788-2796.  
807 Yao, V., Kaletsky, R., Keyes, W., Mor, D.E., Wong, A.K., Sohrabi, S., Murphy, C.T., and  
808 Troyanskaya, O.G. (2018). An integrative tissue-network approach to identify and test human  
809 disease genes. *Nat Biotechnol*.  
810 Zhang, J., Li, X., Olmedo, M., Holdorf, A.D., Shang, Y., Artal-Sanz, M., Yilmaz, L.S., and  
811 Walhout, A.J.M. (2019). A Delicate Balance between Bacterial Iron and Reactive Oxygen  
812 Species Supports Optimal *C. elegans* Development. *Cell Host Microbe* 26, 400-411 e403.

813 Zhang, Q., Wu, X., Chen, P., Liu, L., Xin, N., Tian, Y., and Dillin, A. (2018). The  
814 Mitochondrial Unfolded Protein Response Is Mediated Cell-Non-autonomously by Retromer-  
815 Dependent Wnt Signaling. *Cell* 174, 870-883 e817.  
816 Zhou, Y., Smith, D., Leong, B.J., Brannstrom, K., Almqvist, F., and Chapman, M.R. (2012).  
817 Promiscuous cross-seeding between bacterial amyloids promotes interspecies biofilms. *J Biol*  
818 *Chem* 287, 35092-35103.  
819

## 820 Tables and Figure Legends

### 821 Table 1. Deletion of 38 *E. coli* genes led to amelioration of $\alpha$ -syn-induced neurodegeneration.

822

823 **Figure 1. Genome-wide screen for pro-neurodegenerative genes in *E. coli*.** (A) The flowchart of  
824 the screen using UM10 *unkIs7[aex-3p:: $\alpha$ -syn(A53T), dat-1p::gfp]* and UM6 *unkIs9 [dat-1p:: $\alpha$ -*  
825 *syn(A53T), dat-1p::gfp]* strains and the Keio library. (B) Representative images of uncoordinated  
826 movement and ADE neurodegeneration in UM10 animals fed with wild-type (WT) K12 *E. coli* and  
827 the restored locomotion and intact ADE neurons in animals fed with *csgA(-)* K12. (C) Percentage of  
828 UM10 animals with 2 ADE neurons when fed with WT, *csgA(-)* and *csgB(-)* K12 on various days into  
829 adulthood. (D) Locomotion rate of UM10 animals at L4 stage and day-two-adult stage when fed with  
830 K12 WT, *csgA(-)* and *csgB(-)*. Mean  $\pm$  SD were shown and each dot represents one animal assayed.  
831 Double asterisks indicate statistical significance ( $p < 0.01$ ) in multiple comparisons using ANOVA  
832 analysis followed by a Tukey HSD post-hoc test. The same applies to all other figures. (E)  
833 Locomotion rate of wild-type N2 and UM6 animals on and off the bacteria lawn. UM6 animals  
834 exhibited impairment in food-induced basal slowing response when fed with WT K12, and the  
835 slowing response is restored when UM6 animals were fed with *csgA(-)* K12.

836

837 **Figure 2. Bacterial curli production promotes  $\alpha$ -syn-induced neurodegeneration.** (A) WT and  
838 mutant K12 *E. coli* and WT and *csgA(-)* UTI2 *E. coli* were grown on Congo Red indicator plates at 25  
839 °C for two days to visualize curli production. Curli subunit mutants are in black box and mutants that  
840 were found in our screen and also showed reduced curli production are in pink box. (B) Percentage of  
841 UM10 *unkIs7[aex-3p:: $\alpha$ -syn(A53T), dat-1p::gfp]* animals with Non-Unc phenotype at L4 stage or 2  
842 ADE neurons at day-two-adult stage when fed with either heat-killed WT, *csgA(-)*, and *csgB(-)* K12  
843 or a mixture of WT with *csgA(-)* or *csgB(-)* K12 at 1:99 ratio (indicated as 99% A(-) or B(-),  
844 respectively) or a mixture of *csgA(-)* and *csgB(-)* at 1:1 ratio (indicated as A(-):B(-)=1:1). Mean  $\pm$  SD  
845 were shown and each dot represents one independent experiment with 20 to 30 animals scored. (C)  
846 Percentage of UM10 animals with Non-Unc phenotype and two intact ADE neurons when fed with  
847 either K12 WT or *csgA(-)* at different developmental stages. The dotted lines indicate the timing of  
848 diet switch at specific stages from egg to day-one-adults (D1A) or day-two-adults (D2A). (D) WT  
849 K12 and UTI2 *E. coli* and their derivative containing the *csgA::3xFLAG* genomic edits were grown  
850 on Congo red indicator plates with or without 200  $\mu$ g/ml EGCG. Western blot of the bacteria lysate  
851 using anti-FLAG antibodies were used to confirm the inhibition of CsgA expression by EGCG. Anti-  
852 GAPDH blotting was used as loading control. (E) Percentage of UM10 animals with Non-Unc  
853 phenotype and two intact ADE neurons or the percentage of UM6 *unkIs9 [dat-1p:: $\alpha$ -syn(A53T), dat-*  
854 *1p::gfp]* animals with two ADEs when grown on NGM plates that contained 200  $\mu$ g/ml EGCG or  
855 empty vehicle and seeded with EGCG-treated or untreated WT K12. For the treatment of K12 with  
856 EGCG, a single colony was cultured with LB medium containing 200  $\mu$ g/ml EGCG overnight prior to  
857 seeding on NGM plate. The mean  $\pm$  SD of three independent experiments (25 animals were scored for  
858 each experiment) is shown.

859

860 **Figure 3. Bacterial curli promotes  $\alpha$ -syn aggregation.** (A) Representative images of  $\alpha$ -syn::YFP  
861 aggregates in the muscle of NL5901 *pkIs2386[unc-54p:: $\alpha$ -synuclein::YFP; unc-119(+)]* animals fed  
862 with different bacteria. Aggregates at the head region of day one adults were shown. Scale bar = 20  
863  $\mu$ m. For image quantification, the number of fluorescent aggregates in the same head area were  
864 quantified manually for fifteen worms per group. Mean  $\pm$  SD were shown. (B) Anti- $\alpha$ -syn antibody  
865 staining of UM10 *unkIs7[aex-3p:: $\alpha$ -syn(A53T), dat-1p::gfp]* animals at L2 stage fed with WT or  
866 *csgA(-)* K12. Scale bar = 20  $\mu$ m. (C) Anti- $\alpha$ -syn staining showed the  $\alpha$ -syn aggregates (arrows) in the  
867 DA neurons of day two adults in UM6 *unkIs9 [dat-1p:: $\alpha$ -syn(A53T), dat-1p::gfp]* animals. Animals  
868 fed with *csgA(-)* K12 showed less aggregation. GFP expressed from the *dat-1* promoter labels the DA  
869 neurons. Scale bar=10  $\mu$ m. (D) Sequential fractionation of the lysate of NL5901 and UM10 animals  
870 fed with WT or *csgA(-)* K12 and different fractions were blotted by anti- $\alpha$ -syn antibodies in western  
871 blot assays. Relative intensity of different fractions was quantified using ImageJ and normalized to  
872 whole animal lysate (WL). Anti-tubulin and anti-GFP blotting were used as internal controls. Arrow



873 and asterisk indicate intact and degraded  $\alpha$ -syn::YFP, respectively. (E) Western blot of  $\alpha$ -syn and  
874 tubulin in the lysate of UM10 animals fed with WT K12 and treated with proteasome inhibitors  
875 MG132 (11  $\mu$ M) and Bortezomib (13  $\mu$ M). (F) Percentage of UM10 animals with Non-Unc  
876 phenotype and two intact ADE neurons under the treatment of ubiquitination inhibitor PYR-41 (1.4  
877 mM) or proteasome inhibitors MG132 (11  $\mu$ M) and Bortezomib (13  $\mu$ M). The mean  $\pm$  SD of three  
878 independent experiments (20-30 animals were scored for each experiment) is shown.  
879

880 **Figure 4. CsgA colocalizes with  $\alpha$ -syn.** (A) Day five adults of NL5901 *pkIs2386[unc-54p:: $\alpha$ -*  
881 *synuclein::YFP; unc-119(+)]* animals fed with *UTI2-csgA-3xFLAG* bacteria were stained with anti-  
882 FLAG (red) antibodies. Insets show the enlarged region outline by the dashed box and indicate the  
883 colocalization of CsgA and  $\alpha$ -syn. (B) Day five adults of CGZ512 *unkEx109[myo-3p:: $\alpha$ -syn(A53T);*  
884 *dpy-5(+)]* animals fed with *UTI2-csgA-3xFLAG* bacteria were stained with anti- $\alpha$ -syn (green) and  
885 anti-FLAG (red) antibodies. Insets are enlarged images of the boxed regions. (C) Day one adults of  
886 UM6 *unkIs9[dat-1p:: $\alpha$ -syn(A53T), dat-1p::gfp]* animals fed with *UTI2-csgA-3xFLAG* bacteria were  
887 stained with both anti- $\alpha$ -syn (cyan) and anti-FLAG (red) antibodies. GFP signal indicates the position  
888 of the DA neurons. Colocalization of CsgA and  $\alpha$ -syn were observed in all three types of DA  
889 neurons, CEP, ADE, and PDE neurons. Inserts are enlarged images of the boxed region showing the  
890 colocalization in ADE and PDE neurons. Scale bar = 20  $\mu$ m in all panels. Images were processed  
891 using the Leica THUNDER imaging system. The raw images can be found in Figure S5.  
892

893 **Figure 5. Bacterial curli promotes  $\alpha$ -syn-induced mitochondrial dysfunction.** (A) Venn diagram  
894 of genes that are downregulated in UM10 *unkIs7[aex-3p:: $\alpha$ -syn(A53T), dat-1p::gfp]* animals  
895 compared to N2 control and genes that are upregulated in UM10 animals fed with *csgA(-)* K12  
896 compared to animals fed with WT K12. Gene ontology analysis for down-regulated genes between  
897 N2 and UM10 using DAVID. (B) RT-qPCR measurement of mRNA level of mitochondrial genes  
898 *alh-13*, *mel-32*, *ech-6* and *hphd-1* in day one adults of UM10 animals fed with WT or *csgA(-)* K12  
899 bacteria. Three biological replicates were performed and mean  $\pm$  SD were shown. (C) Basal  
900 respiration, ATP-linked respiration, and Non-mitochondrial respiration (measured as oxygen  
901 consumption rate) of day one adults of N2, MQ887 *isp-1(qm150)*, and UM10 animals fed with WT or  
902 *csgA(-)* K12 bacteria. Representative results of 6~18 repeats for each condition were shown as mean  $\pm$   
903 SD. 70 to 160 animals were added to each microplate well. (D) Representative images of the ALM  
904 neurons in CGZ833 *unkIs7; twnEx8[mec-7p::tomm-20::mCherry; myo-2p::GFP]* animals fed with  
905 WT or *csgA(-)* K12. Scale bar=2  $\mu$ m. Quantification shows the percentages of neurons with highly  
906 fragmented mitochondria in the soma in day two and day six adults. At least 20 animals were  
907 examined. (E) Representative images of *zcls13[hsp-6::GFP]* and *zcls39[dve-1p::GFP]* reporter  
908 expression in animals carrying *unkIs7[aex-3p:: $\alpha$ -syn(A53T), dat-1p::gfp]* and fed with WT or *csgA(-)*  
909 K12 bacteria. Insets are enlarged images of the boxed region showing nuclear localization of DVE-1.  
910 Scale bar=25  $\mu$ m. Mean  $\pm$  SD were shown for the quantification of the *hsp-6p::GFP* intensity and the  
911 number of intestinal cells showing DVE-1::GFP nuclear puncta (20 animals were analysed for each  
912 experiment).  
913

914 **Figure 6. Bacterial curli promotes neurodegeneration in *C. elegans* models of ALS, AD, and HD.**

915 (A) Representative images of ALM neurons and ventral nerve cord (VNC) neurons in ALS strains  
916 carrying the transgene *snb-1p::SOD1(G85R)::YFP* or *snb-1p::SOD1(WT)::YFP* and fed with WT or  
917 *csgA(-)* K12. At least thirty day two adults were assessed. (B) The percentage of animals with visible  
918 ASER neurons in FDX25 *sesIs25[flp-6p::A $\beta$ 1-42; gcy-5p::GFP; rol-6(D)]* animals fed with WT or  
919 *csgA(-)* K12. For each condition, 50 animals were scored. (C) Learning index of day one adults of  
920 CL2355 *smg-1(cc546) dvIs50 [snb-1p::A $\beta$ 1-42::3'UTR; mtl-2::GFP]* animals grown on WT and  
921 *csgA(-)* K12 and WT and *csgA(-)* UTI2 bacteria in an associative learning assay. Two to four hundred  
922 animals were used in each experiment; 3 biological replicates and 3 technical replicates were  
923 performed. Mean  $\pm$  SD is shown. (D) Morphological changes of the ALM neurons and the alteration  
924 of Huntingtin (Htt) aggregation pattern in PLM and PVD neurons in TU6295 *uls115[mec-*  
925 *17p::TagRFP]; igIs5[mec-3p::htt57-128Q::GFP; lin-15(+)]* animals fed with *csgA(-)* K12 compared

926 to animals fed with WT K12. Twenty to thirty day one adults were assessed for each condition. (E)  
927 Harsh touch sensitivity of TU6295 animals fed with WT or *csgA*(-) K12 bacteria.

928

929 **Figure 7. *CsgA*-derived amyloidogenic peptides cross-seed  $\alpha$ -syn and induce neuronal death in**  
930 **human cells.** (A) Representative anti- $\alpha$ -syn immunofluorescent images of SH-SY5Y cells transfected  
931 with  $\alpha$ -syn(WT or A53T)-expressing constructs and then treated with *CsgA*-derived amyloidogenic  
932 hexapeptides, non-amyloidogenic control or empty vehicle. Scale bar = 20  $\mu$ m in all panels in this  
933 Figure. (B) Corrected total cell fluorescence (CTCF shown as mean  $\pm$  SD) from the experiments  
934 shown in (A). Amyloidogenic peptides significantly enhanced  $\alpha$ -syn expression and accumulation in  
935 the SH-SY5Y cells. (C) SH-SY5Y cells transfected with  $\alpha$ -syn(WT or A53T)-expressing constructs  
936 and treated with Rhodamine-conjugated QYGGNN peptides (red) were then stained with anti- $\alpha$ -syn  
937 antibodies (green) to show colocalization of *CsgA*-derived peptides and  $\alpha$ -syn. Insets are enlarged  
938 images of the boxed regions. Images were processed using the Leica THUNDER imaging system.  
939 The raw images can be found in Figure S6B. (D) Intensity profile for the orange dashed line in (C).  
940 (E) Representative results of CCK-8 cell viability assays using  $\alpha$ -syn(WT or A53T)-expressing SH-  
941 SY5Y cells treated with amyloidogenic hexapeptides, non-amyloidogenic control or empty vehicle.  
942 Mean  $\pm$  SD is shown and single asterisk indicates  $p < 0.05$  in a one-way ANOVA followed by a  
943 Tukey's post-hoc test.  
944

945 **Table 1. Deletion of 38 *E. coli* genes led to amelioration of  $\alpha$ -syn-induced neurodegeneration.**  
946

| Bacterial clones                         | Pan-neuronal $\alpha$ -syn (A53T) |              | DA-specific $\alpha$ -syn (A53T) | Gene function                                                              |
|------------------------------------------|-----------------------------------|--------------|----------------------------------|----------------------------------------------------------------------------|
|                                          | Non-Unc%                          | 2ADEs%       | 2ADEs%                           |                                                                            |
| K12 WT                                   | 0%                                | 6 $\pm$ 8%   | 11 $\pm$ 10%                     |                                                                            |
| <b>Curli amyloid fibril formation</b>    |                                   |              |                                  |                                                                            |
| <i>csgA(-)</i>                           | 33 $\pm$ 4%                       | 50 $\pm$ 7%  | 50 $\pm$ 7%                      | Major subunit of curlin                                                    |
| <i>csgB(-)</i>                           | 33 $\pm$ 8%                       | 42 $\pm$ 6%  | 42 $\pm$ 12%                     | Minor subunit of curlin                                                    |
| <b>LPS production and assembly</b>       |                                   |              |                                  |                                                                            |
| <i>lapA(-)</i>                           | 35 $\pm$ 9%                       | 28 $\pm$ 8%  | 35 $\pm$ 19%                     | Lipopolysaccharide assembly protein A                                      |
| <i>lapB(-)</i>                           | 41 $\pm$ 5%                       | 35 $\pm$ 7%  | 42 $\pm$ 6%                      | Lipopolysaccharide assembly protein B                                      |
| <i>lpcA(-)</i>                           | 35 $\pm$ 9%                       | 42 $\pm$ 13% | 33 $\pm$ 14%                     | Sedoheptulose 7-phosphate isomerase; LPS biosynthesis                      |
| <i>rfe(-)</i>                            | 29 $\pm$ 16%                      | 45 $\pm$ 15% | 38 $\pm$ 8%                      | Synthesis of ECA and lipopolysaccharide O-side chains                      |
| <i>pldA(-)</i>                           | 28 $\pm$ 10%                      | 43 $\pm$ 19% | 30 $\pm$ 4%                      | Outer membrane phospholipase A; mlaA-dependent LPS hyperproduction         |
| <b>Adenosyl-cobalamin biosynthesis</b>   |                                   |              |                                  |                                                                            |
| <i>cobS(-)</i>                           | 31 $\pm$ 5%                       | 35 $\pm$ 7%  | 33 $\pm$ 6%                      | Cobalamin 5'-phosphate synthase                                            |
| <i>btuR(-)</i>                           | 29 $\pm$ 4%                       | 27 $\pm$ 6%  | 35 $\pm$ 11%                     | Cobinamide/cobalamin adenosyltransferase                                   |
| <i>eutT(-)</i>                           | 30 $\pm$ 5%                       | 40 $\pm$ 15% | 37 $\pm$ 10%                     | Putative ethanolamine utilization cobalamin adenosyltransferase            |
| <b>Inhibitors of eukaryotic lysozyme</b> |                                   |              |                                  |                                                                            |
| <i>ivy(-)</i>                            | 45 $\pm$ 27%                      | 43 $\pm$ 12% | 42 $\pm$ 12%                     | Inhibitor of vertebrate lysozyme                                           |
| <i>ydhA(-)</i>                           | 30 $\pm$ 4%                       | 43 $\pm$ 18% | 32 $\pm$ 14%                     | Inhibitor of c-type lysozyme, putative lipoprotein                         |
| <b>Oxidative stress response</b>         |                                   |              |                                  |                                                                            |
| <i>gpmI(-)</i>                           | 43 $\pm$ 17%                      | 37 $\pm$ 10% | 57 $\pm$ 17%                     | 2,3-bisphosphoglycerate-independent phosphoglycerate mutase                |
| <i>yaaA(-)</i>                           | 43 $\pm$ 11%                      | 45 $\pm$ 15% | 28 $\pm$ 15%                     | Peroxide stress resistance protein                                         |
| <i>sodA(-)</i>                           | 35 $\pm$ 8%                       | 38 $\pm$ 15% | 30 $\pm$ 15%                     | Superoxide dismutase (Mn)                                                  |
| <i>msrA(-)</i>                           | 38 $\pm$ 8%                       | 38 $\pm$ 12% | 30 $\pm$ 8%                      | Peptide methionine sulfoxide reductase                                     |
| <i>nrfA(-)</i>                           | 26 $\pm$ 10%                      | 27 $\pm$ 2%  | 35 $\pm$ 11%                     | Cytochrome c nitrite reductase subunit                                     |
| <i>yfiD(-)</i>                           | 31 $\pm$ 5%                       | 35 $\pm$ 7%  | 32 $\pm$ 2%                      | Stress-induced alternate pyruvate formate-lyase subunit                    |
| <b>Metabolism and energy homeostasis</b> |                                   |              |                                  |                                                                            |
| <i>pck(-)</i>                            | 39 $\pm$ 7%                       | 37 $\pm$ 9%  | 48 $\pm$ 6%                      | Phosphoenolpyruvate carboxykinase; gluconeogenesis                         |
| <i>tpiA(-)</i>                           | 26 $\pm$ 2%                       | 27 $\pm$ 5%  | 43 $\pm$ 2%                      | Triose-phosphate isomerase; glycolysis and gluconeogenesis                 |
| <i>ldhA(-)</i>                           | 39 $\pm$ 16%                      | 25 $\pm$ 4%  | 27 $\pm$ 14%                     | D-lactate dehydrogenase                                                    |
| <i>lldD(-)</i>                           | 29 $\pm$ 6%                       | 31 $\pm$ 5%  | 30 $\pm$ 8%                      | L-lactate dehydrogenase                                                    |
| <i>tdh(-)</i>                            | 31 $\pm$ 8%                       | 32 $\pm$ 6%  | 32 $\pm$ 6%                      | Threonine dehydrogenase; major catabolic pathway for threonine utilization |

|                                                 |        |        |        |                                                                |
|-------------------------------------------------|--------|--------|--------|----------------------------------------------------------------|
| <i>cysQ(-)</i>                                  | 41±10% | 38±6%  | 28±8%  | 3'(2'),5'-bisphosphate nucleotidase                            |
| <i>nrdD(-)</i>                                  | 26±10% | 38±2%  | 27±6%  | Anaerobic ribonucleoside-triphosphate reductase; DNA synthesis |
| <i>betA(-)</i>                                  | 25±13% | 50±16% | 33±12% | Choline dehydrogenase                                          |
| <b>Transporter</b>                              |        |        |        |                                                                |
| <i>yjcD(-)</i>                                  | 31±8%  | 33±10% | 38±2%  | Guanine/hypoxanthine transporter                               |
| <i>mdtC(-)</i>                                  | 30±4%  | 43±14% | 37±8%  | Multidrug efflux pump RND permease subunit                     |
| <i>ybbY(-)</i>                                  | 29±4%  | 40±15% | 32±5%  | Putative purine transporter                                    |
| <i>tolQ(-)</i>                                  | 30±6%  | 50±11% | 25±12% | An inner membrane component of the Tol-Pal system              |
| <b>Transcription factors and DNA regulation</b> |        |        |        |                                                                |
| <i>yebC(-)</i>                                  | 33±7%  | 40±16% | 38±6%  | Putative transcriptional regulator                             |
| <i>ybbS(-)</i>                                  | 30±6%  | 42±16% | 43±2%  | DNA-binding transcriptional activator                          |
| <i>rdgC(-)</i>                                  | 26±5%  | 43±15% | 30±14% | Nucleoid-associated protein RdgC                               |
| <b>Others</b>                                   |        |        |        |                                                                |
| <i>ppiD(-)</i>                                  | 41±17% | 37±16% | 42±10% | Periplasmic folding chaperone                                  |
| <i>baeS(-)</i>                                  | 31±4%  | 40±8%  | 35±21% | Sensory histidine kinase                                       |
| <i>ycaC(-)</i>                                  | 31±4%  | 38±15% | 42±5%  | Putative hydrolase                                             |
| <i>ybjQ(-)</i>                                  | 30±13% | 32±6%  | 43±15% | Putative heavy metal binding protein                           |
| <i>yfeY(-)</i>                                  | 29±2%  | 45±15% | 27±17% | DUF1131 domain-containing lipoprotein                          |

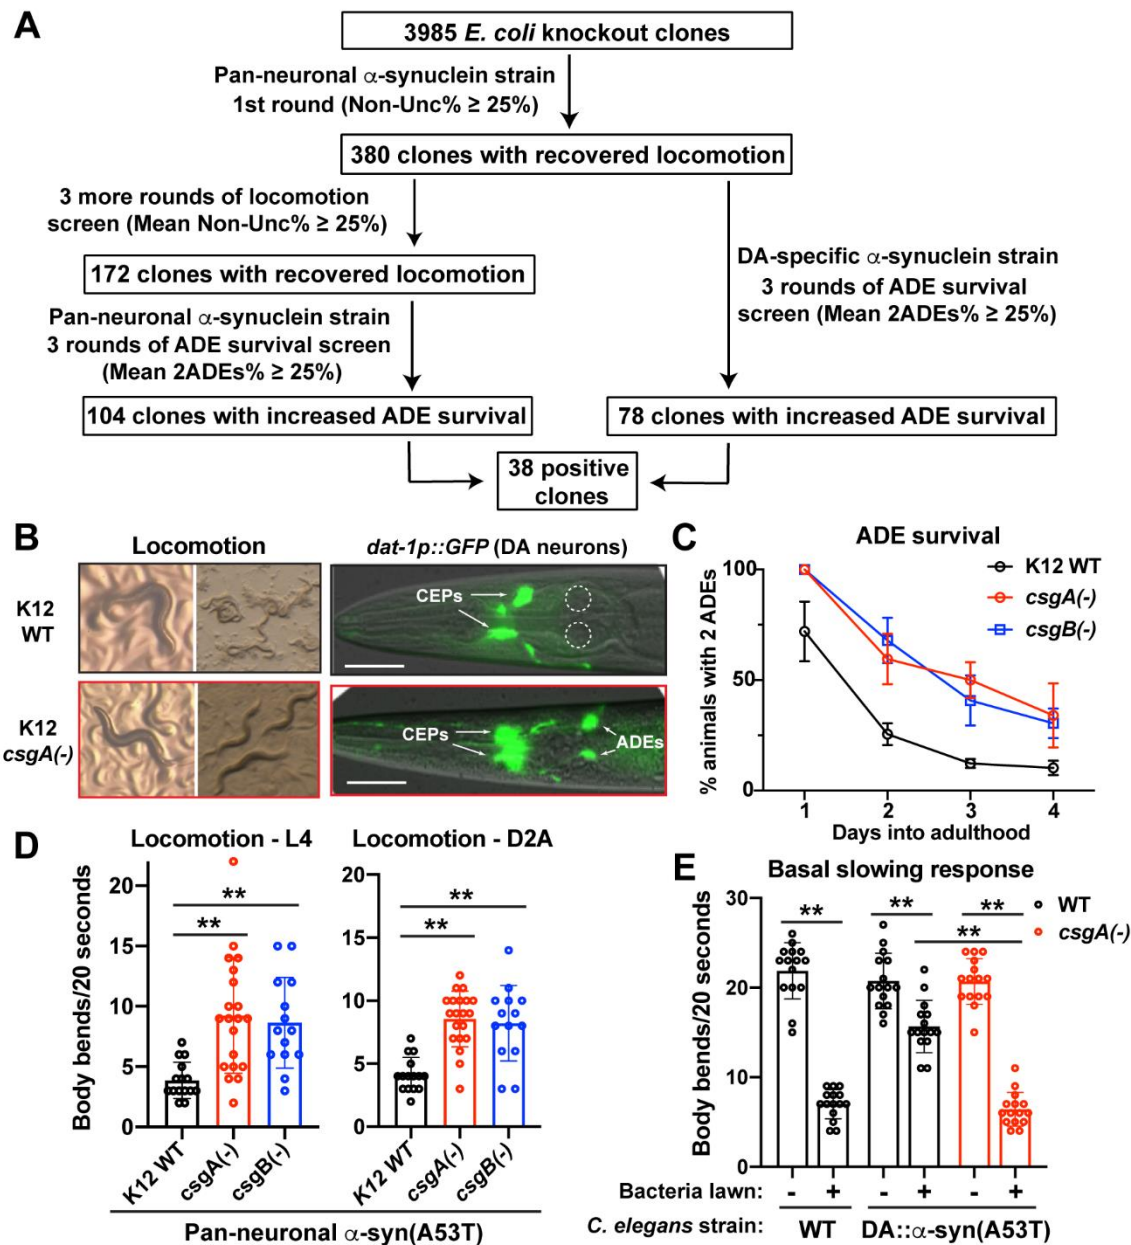

948  
949  
950  
951  
952  
953  
954  
955  
956  
957  
958  
959  
960  
961  
962

**Figure 1. Genome-wide screen for pro-neurodegenerative genes in *E. coli*.** (A) The flowchart of the screen using UM10 *unkIs7*[*aex-3p::α-syn(A53T)*, *dat-1p::gfp*] and UM6 *unkIs9* [*dat-1p::α-syn(A53T)*, *dat-1p::gfp*] strains and the Keio library. (B) Representative images of uncoordinated movement and ADE neurodegeneration in UM10 animals fed with wild-type (WT) K12 *E. coli* and the restored locomotion and intact ADE neurons in animals fed with *csgA(-)* K12. (C) Percentage of UM10 animals with 2 ADE neurons when fed with WT, *csgA(-)* and *csgB(-)* K12 on various days into adulthood. (D) Locomotion rate of UM10 animals at L4 stage and day-two-adult stage when fed with K12 WT, *csgA(-)* and *csgB(-)*. Mean ± SD were shown and each dot represents one animal assayed. Double asterisks indicate statistical significance ( $p < 0.01$ ) in multiple comparisons using ANOVA analysis followed by a Tukey HSD post-hoc test. The same applies to all other figures. (E) Locomotion rate of wild-type N2 and UM6 animals on and off the bacteria lawn. UM6 animals exhibited impairment in food-induced basal slowing response when fed with WT K12, and the slowing response is restored when UM6 animals were fed with *csgA(-)* K12.

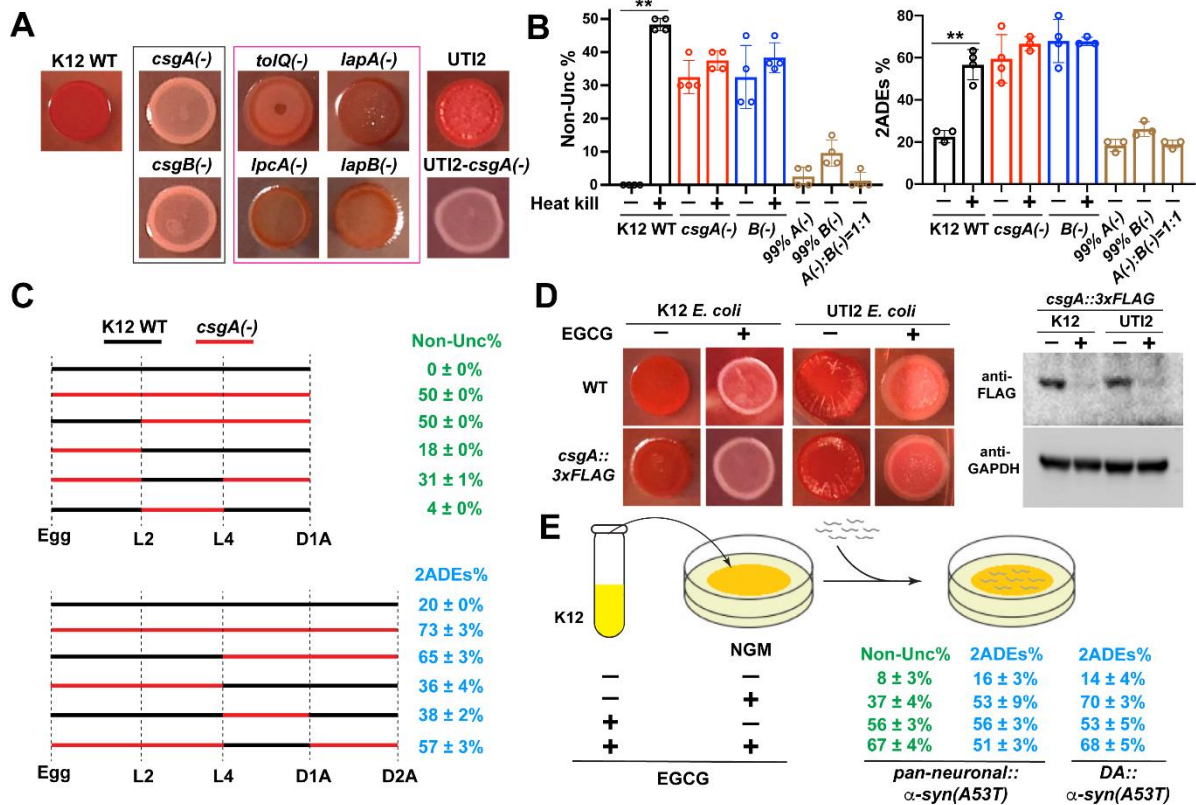

963

964

965

966

967

968

969

970

971

972

973

974

975

976

977

978

979

980

981

982

983

984

985

986

**Figure 2. Bacterial curli production promotes  $\alpha$ -syn-induced neurodegeneration.** (A) WT and mutant K12 *E. coli* and WT and *csgA(-)* UTI2 *E. coli* were grown on Congo Red indicator plates at 25 °C for two days to visualize curli production. Curli subunit mutants are in black box and mutants that were found in our screen and also showed reduced curli production are in pink box. (B) Percentage of UM10 *unkIs7[aex-3p:: $\alpha$ -syn(A53T), dat-1p::gfp]* animals with Non-Unc phenotype at L4 stage or 2 ADE neurons at day-two-adult stage when fed with either heat-killed WT, *csgA(-)*, and *csgB(-)* K12 or a mixture of WT with *csgA(-)* or *csgB(-)* K12 at 1:99 ratio (indicated as 99% A(-) or B(-), respectively) or a mixture of *csgA(-)* and *csgB(-)* at 1:1 ratio (indicated as A(-):B(-)=1:1). Mean  $\pm$  SD were shown and each dot represents one independent experiment with 20 to 30 animals scored. (C) Percentage of UM10 animals with Non-Unc phenotype and two intact ADE neurons when fed with either K12 WT or *csgA(-)* at different developmental stages. The dotted lines indicate the timing of diet switch at specific stages from egg to day-one-adults (D1A) or day-two-adults (D2A). (D) WT K12 and UTI2 *E. coli* and their derivative containing the *csgA::3xFLAG* genomic edits were grown on Congo red indicator plates with or without 200  $\mu$ g/ml EGCG. Western blot of the bacteria lysate using anti-FLAG antibodies were used to confirm the inhibition of CsgA expression by EGCG. Anti-GAPDH blotting was used as loading control. (E) Percentage of UM10 animals with Non-Unc phenotype and two intact ADE neurons or the percentage of UM6 *unkIs9 [dat-1p:: $\alpha$ -syn(A53T), dat-1p::gfp]* animals with two ADEs when grown on NGM plates that contained 200  $\mu$ g/ml EGCG or empty vehicle and seeded with EGCG-treated or untreated WT K12. For the treatment of K12 with EGCG, a single colony was cultured with LB medium containing 200  $\mu$ g/ml EGCG overnight prior to seeding on NGM plate. The mean  $\pm$  SD of three independent experiments (25 animals were scored for each experiment) is shown.

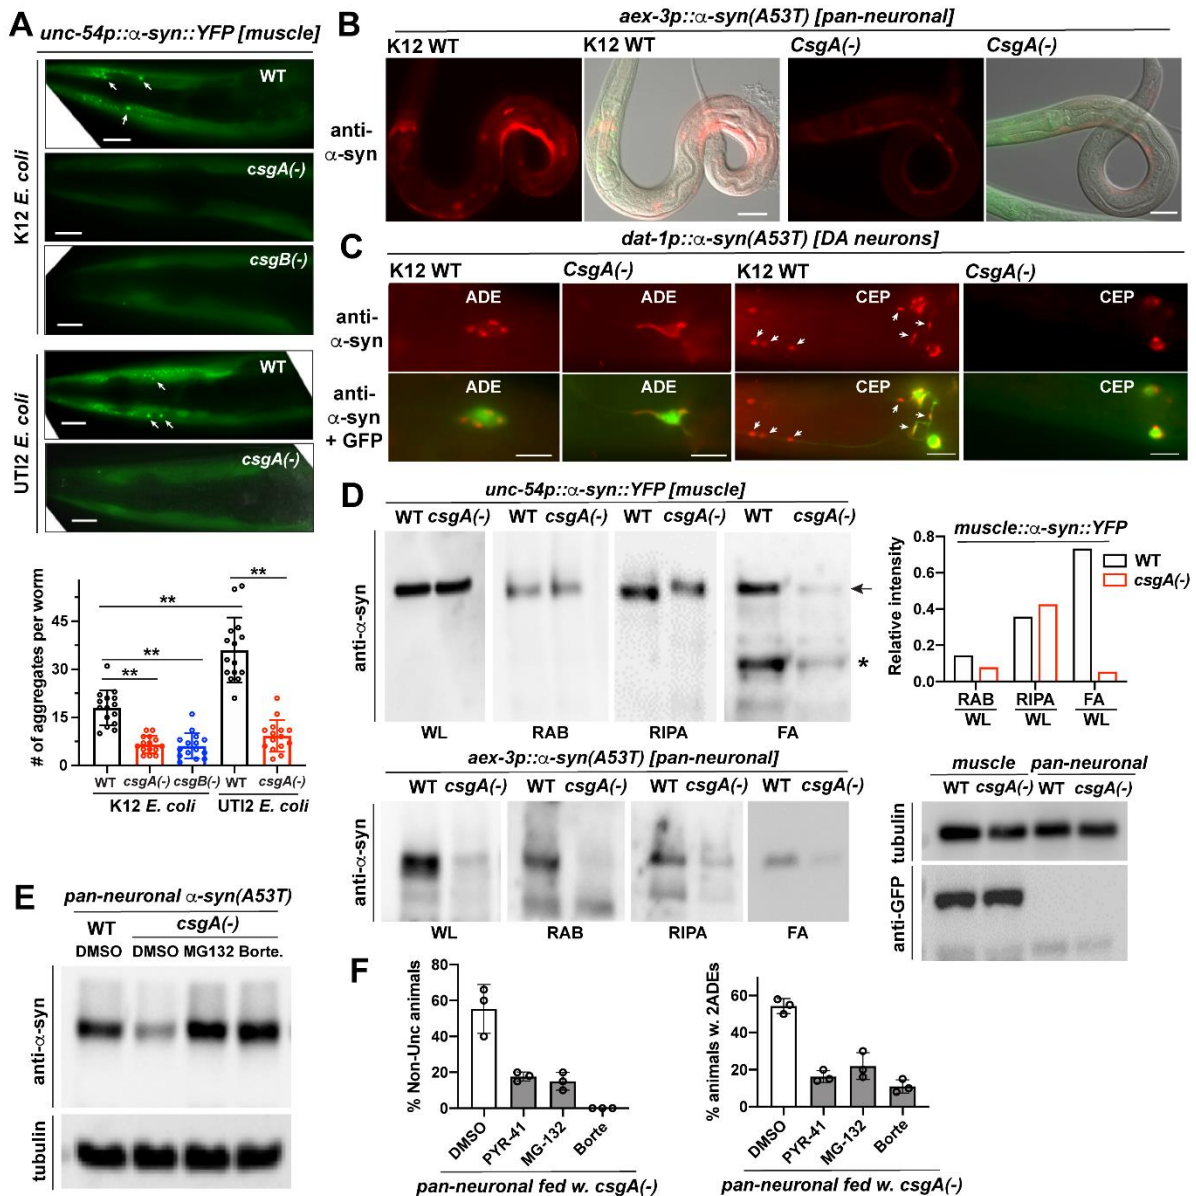

987 **Figure 3. Bacterial curli promotes  $\alpha$ -syn aggregation.** (A) Representative images of  $\alpha$ -syn::YFP  
988 aggregates in the muscle of NL5901 *pkIs2386[unc-54p:: $\alpha$ -synuclein::YFP; unc-119(+)]* animals fed  
989 with different bacteria. Aggregates at the head region of day one adults were shown. Scale bar = 20  
990  $\mu$ m. For image quantification, the number of fluorescent aggregates in the same head area were  
991 quantified manually for fifteen worms per group. Mean  $\pm$  SD were shown. (B) Anti- $\alpha$ -syn antibody  
992 staining of UM10 *unkIs7[aex-3p:: $\alpha$ -syn(A53T), dat-1p::gfp]* animals at L2 stage fed with WT or  
993 *csgA(-)* K12. Scale bar = 20  $\mu$ m. (C) Anti- $\alpha$ -syn staining showed the  $\alpha$ -syn aggregates (arrows) in the  
994 DA neurons of day two adults in UM6 *unkIs9[dat-1p:: $\alpha$ -syn(A53T), dat-1p::gfp]* animals. Animals  
995 fed with *csgA(-)* K12 showed less aggregation. GFP expressed from the *dat-1* promoter labels the DA  
996 neurons. Scale bar=10  $\mu$ m. (D) Sequential fractionation of the lysate of NL5901 and UM10 animals  
997 fed with WT or *csgA(-)* K12 and different fractions were blotted by anti- $\alpha$ -syn antibodies in western  
998 blot assays. Relative intensity of different fractions was quantified using ImageJ and normalized to  
999 whole animal lysate (WL). Anti-tubulin and anti-GFP blotting were used as internal controls. Arrow  
1000 and asterisk indicate intact and degraded  $\alpha$ -syn::YFP, respectively. (E) Western blot of  $\alpha$ -syn and  
1001 tubulin in the lysate of UM10 animals fed with WT K12 and treated with proteasome inhibitors  
1002 MG132 (11  $\mu$ M) and Bortezomib (13  $\mu$ M). (F) Percentage of UM10 animals with Non-Unc  
1003 phenotype and two intact ADE neurons under the treatment of ubiquitination inhibitor PYR-41 (1.4  
1004 mM) or proteasome inhibitors MG132 (11  $\mu$ M) and Bortezomib (13  $\mu$ M). The mean  $\pm$  SD of three  
1005 independent experiments (20-30 animals were scored for each experiment) is shown.

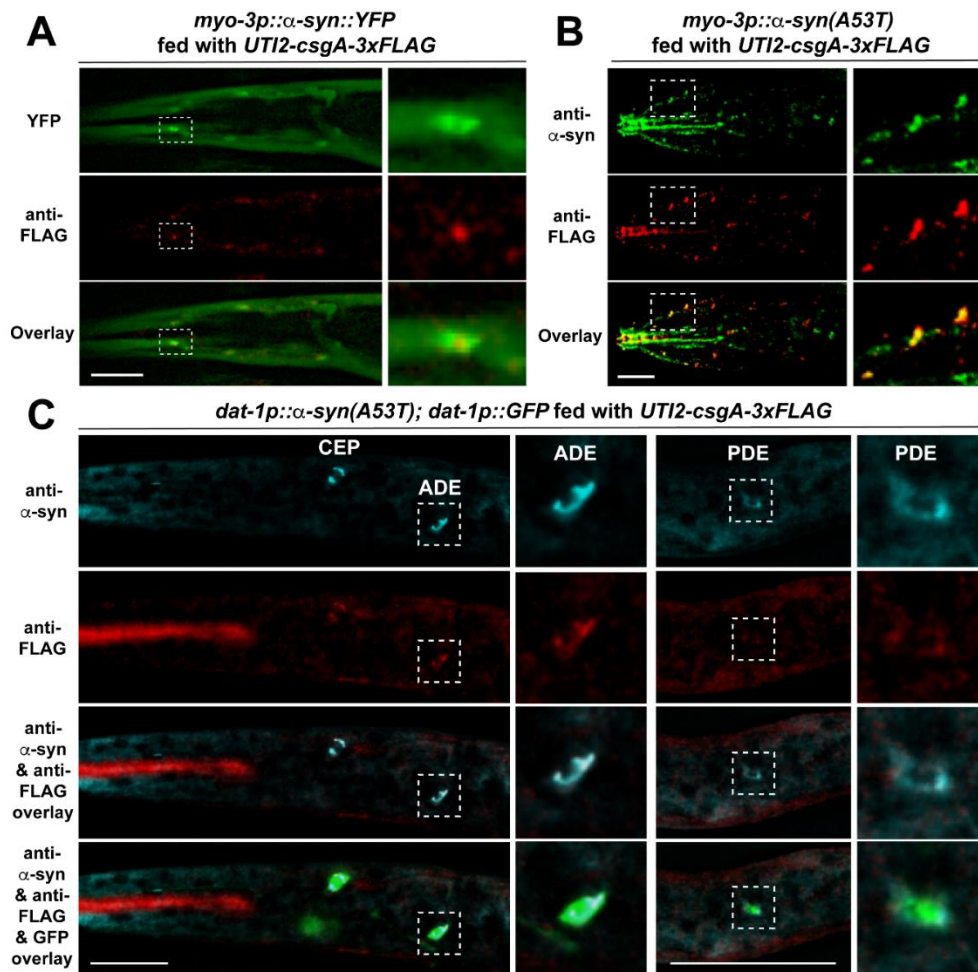

1035

1036 **Figure 4. CsgA colocalizes with α-syn.** (A) Day five adults of NL5901 *pkIs2386[unc-54p::α-*  
 1037 *synuclein::YFP; unc-119(+)]* animals fed with *UTI2-csgA-3xFLAG* bacteria were stained with anti-  
 1038 FLAG (red) antibodies. Insets show the enlarged region outline by the dashed box and indicate the  
 1039 colocalization of CsgA and α-syn. (B) Day five adults of CGZ512 *unkEx109[myo-3p::α-syn(A53T);*  
 1040 *dpy-5(+)]* animals fed with *UTI2-csgA-3xFLAG* bacteria were stained with anti-α-syn (green) and  
 1041 anti-FLAG (red) antibodies. Insets are enlarged images of the boxed regions. (C) Day one adults of  
 1042 UM6 *unkIs9[dat-1p::α-syn(A53T), dat-1p::gfp]* animals fed with *UTI2-csgA-3xFLAG* bacteria were  
 1043 stained with both anti-α-syn (cyan) and anti-FLAG (red) antibodies. GFP signal indicates the position  
 1044 of the DA neurons. Colocalization of CsgA and α-syn were observed in all three types of DA  
 1045 neurons, CEP, ADE, and PDE neurons. Inserts are enlarged images of the boxed region showing the  
 1046 colocalization in ADE and PDE neurons. Scale bar = 20 μm in all panels. Images were processed  
 1047 using the Leica THUNDER imaging system. The raw images can be found in Figure S5.  
 1048



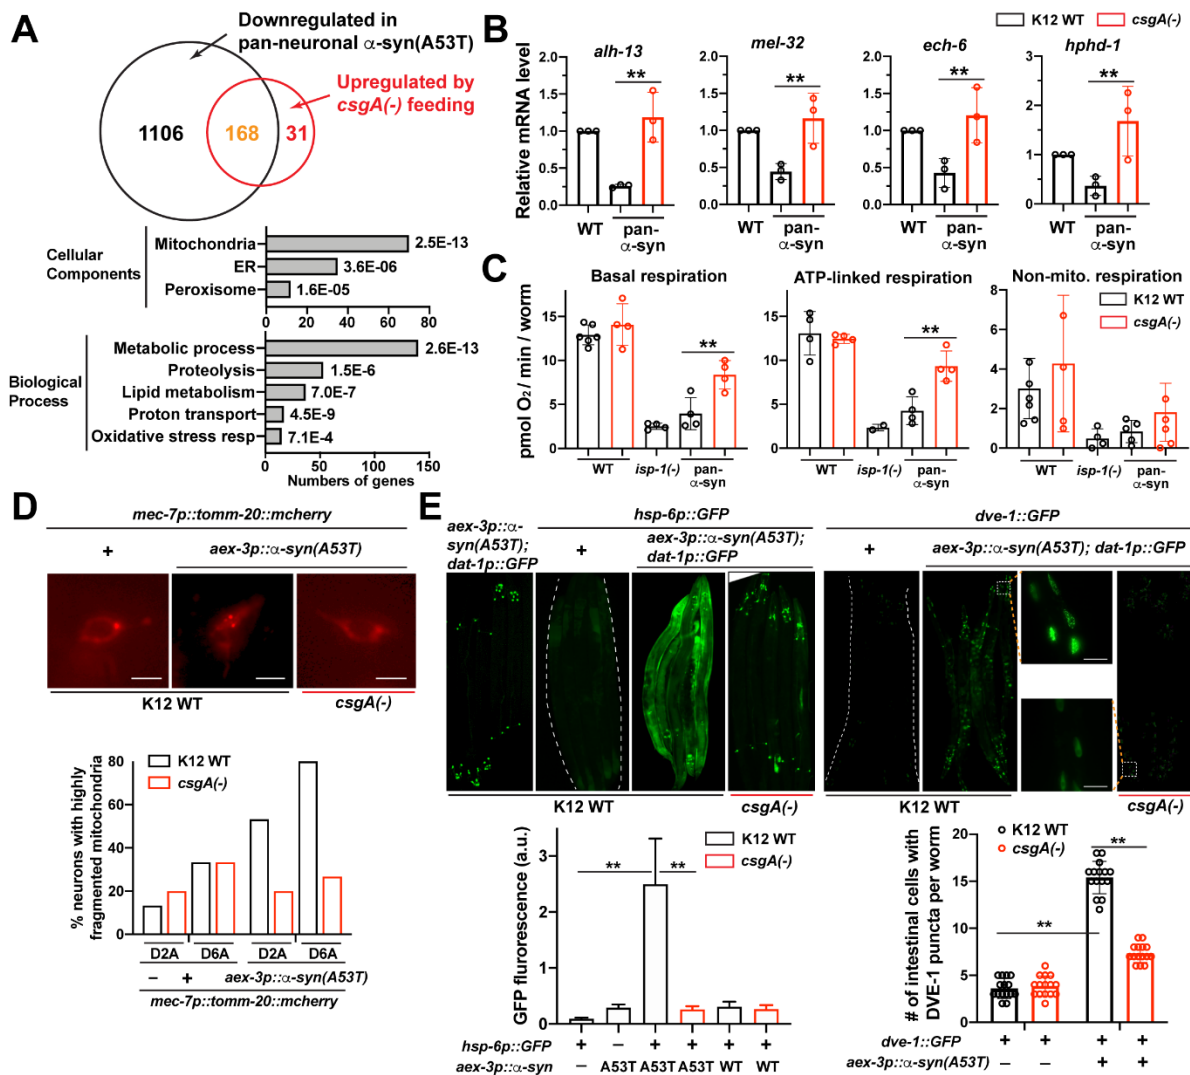

1049

1050

1051 **Figure 5. Bacterial curli promotes  $\alpha$ -syn-induced mitochondrial dysfunction.** (A) Venn diagram

1052 of genes that are downregulated in UM10 *unkIs7[aex-3p::alpha-syn(A53T), dat-1p::gfp]* animals

1053 compared to N2 control and genes that are upregulated in UM10 animals fed with *csgA(-)* K12

1054 compared to animals fed with WT K12. Gene ontology analysis for down-regulated genes between

1055 N2 and UM10 using DAVID. (B) RT-qPCR measurement of mRNA level of mitochondrial genes

1056 *alh-13*, *mel-32*, *ech-6* and *hphd-1* in day one adults of UM10 animals fed with WT or *csgA(-)* K12

1057 bacteria. Three biological replicates were performed and mean  $\pm$  SD were shown. (C) Basal

1058 respiration, ATP-linked respiration, and Non-mitochondrial respiration (measured as oxygen

1059 consumption rate) of day one adults of N2, MQ887 *isp-1(qm150)*, and UM10 animals fed with WT or

1060 *csgA(-)* K12 bacteria. Representative results of 6~18 repeats for each condition were shown as mean  $\pm$

1061 SD. 70 to 160 animals were added to each microplate well. (D) Representative images of the ALM

1062 neurons in CGZ833 *unkIs7; twnEx8[mec-7p::tommm-20::mCherry; myo-2p::GFP]* animals fed with

1063 WT or *csgA(-)* K12. Scale bar=2  $\mu$ m. Quantification shows the percentages of neurons with highly

1064 fragmented mitochondria in the soma in day two and day six adults. At least 20 animals were

1065 examined. (E) Representative images of *zcls13[hsp-6p::GFP]* and *zcls39[dve-1p::GFP]* reporter

1066 expression in animals carrying *unkIs7[aex-3p::alpha-syn(A53T), dat-1p::gfp]* and fed with WT or *csgA(-)*

1067 K12 bacteria. Insets are enlarged images of the boxed region showing nuclear localization of DVE-1.

1068 Scale bar=25  $\mu$ m. Mean  $\pm$  SD were shown for the quantification of the *hsp-6p::GFP* intensity and the

1069 number of intestinal cells showing DVE-1::GFP nuclear puncta (20 animals were analysed for each

1070 experiment).

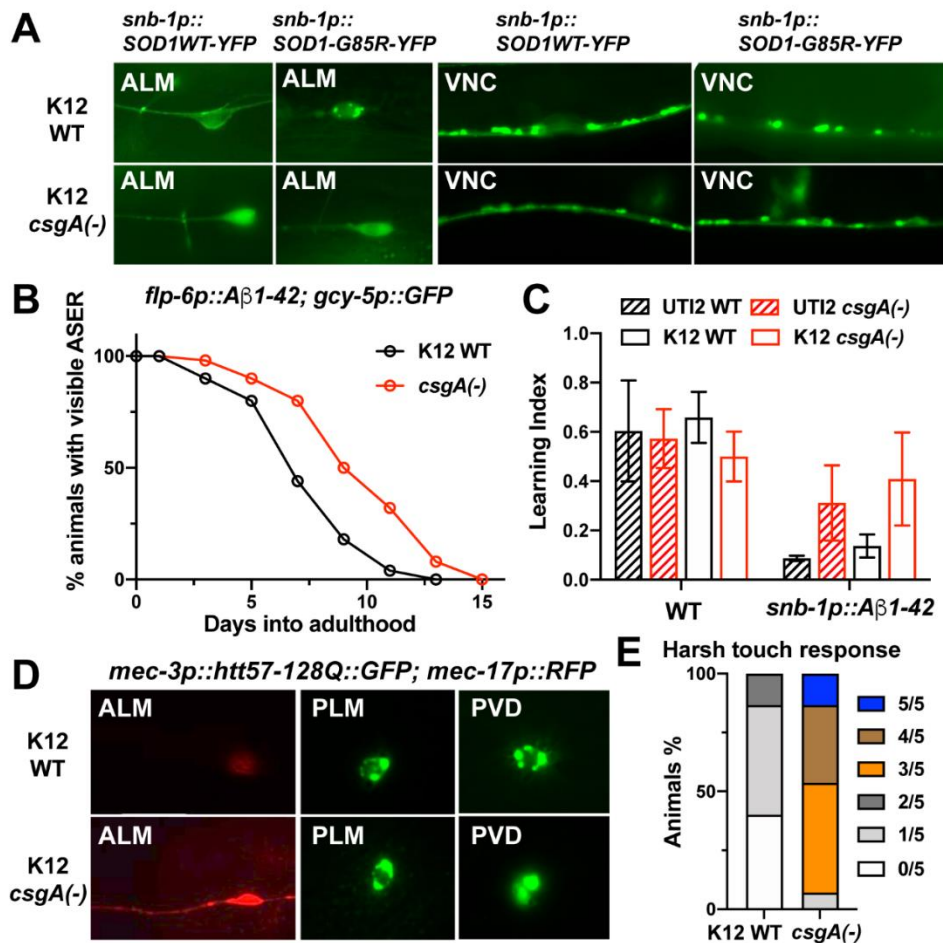

1071  
1072  
1073  
1074  
1075  
1076  
1077  
1078  
1079  
1080  
1081  
1082  
1083  
1084  
1085  
1086  
1087

**Figure 6. Bacterial curli promotes neurodegeneration in *C. elegans* models of ALS, AD, and HD.**

(A) Representative images of ALM neurons and ventral nerve cord (VNC) neurons in ALS strains carrying the transgene *snb-1p::SOD1(G85R)::YFP* or *snb-1p::SOD1(WT)::YFP* and fed with WT or *csgA(-)* K12. At least thirty day two adults were assessed. (B) The percentage of animals with visible ASER neurons in FDX25 *sesIs25[flp-6p::Aβ1-42; gcy-5p::GFP; rol-6(D)]* animals fed with WT or *csgA(-)* K12. For each condition, 50 animals were scored. (C) Learning index of day one adults of CL2355 *smg-1(cc546) dvIs50 [snb-1p::Aβ1-42::3'UTR; mtl-2::GFP]* animals grown on WT and *csgA(-)* K12 and WT and *csgA(-)* UT12 bacteria in an associative learning assay. Two to four hundred animals were used in each experiment; 3 biological replicates and 3 technical replicates were performed. Mean ± SD is shown. (D) Morphological changes of the ALM neurons and the alteration of Huntingtin (Htt) aggregation pattern in PLM and PVD neurons in TU6295 *uIs115[mec-17p::TagRFP]; igIs5[mec-3p::htt57-128Q::GFP; lin-15(+)]* animals fed with *csgA(-)* K12 compared to animals fed with WT K12. Twenty to thirty day one adults were assessed for each condition. (E) Harsh touch sensitivity of TU6295 animals fed with WT or *csgA(-)* K12 bacteria.

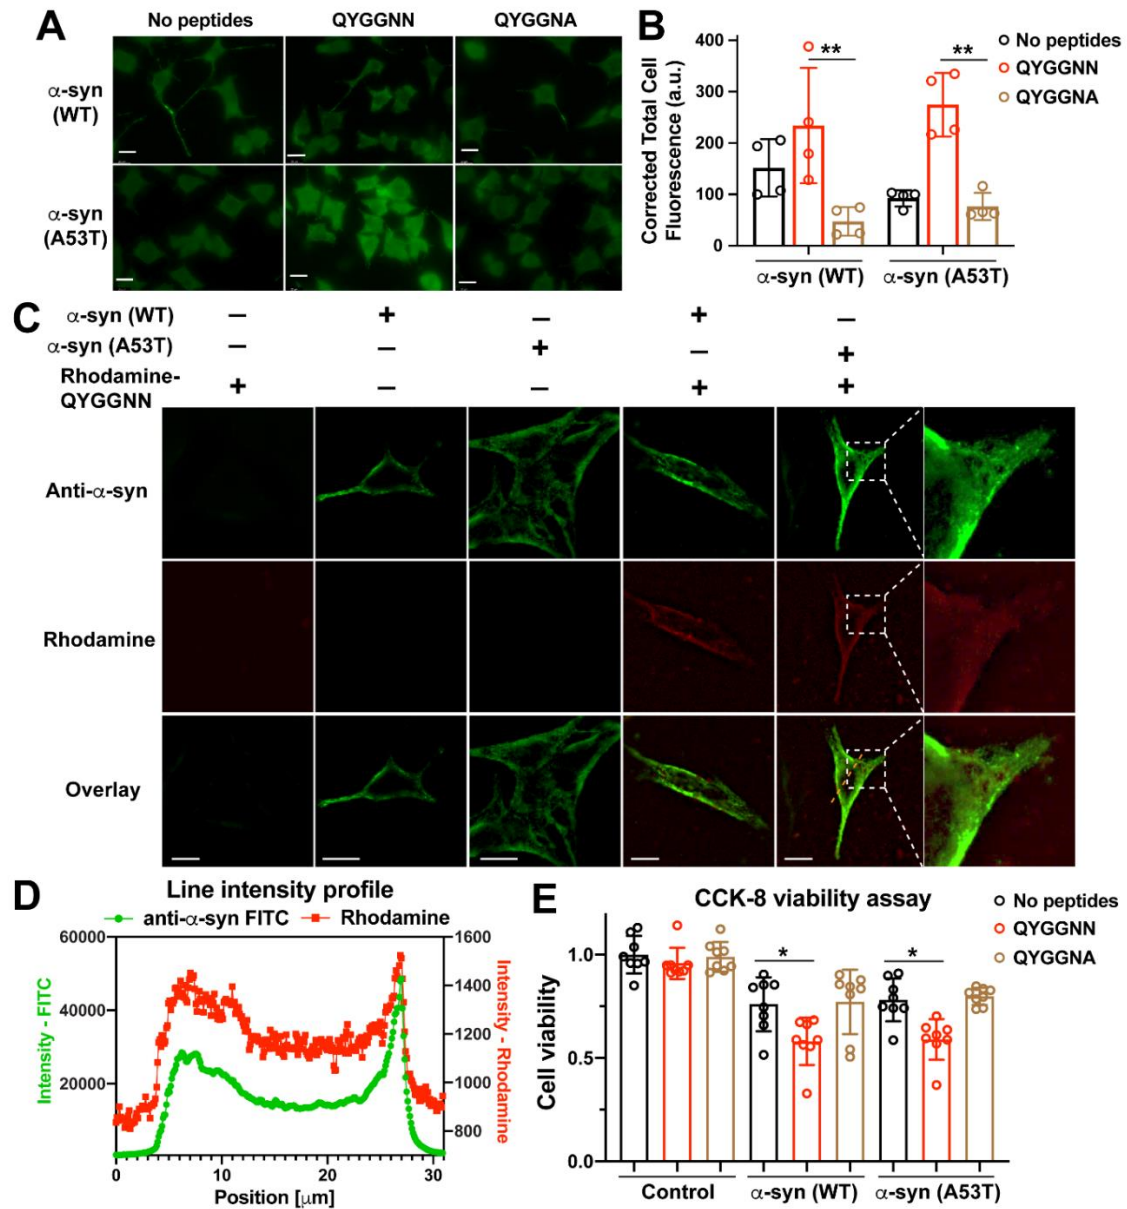

1088  
1089

1090 **Figure 7. CsgA-derived amyloidogenic peptides cross-seed  $\alpha$ -syn and induce neuronal death in**  
 1091 **human cells.** (A) Representative anti- $\alpha$ -syn immunofluorescent images of SH-SY5Y cells transfected  
 1092 with  $\alpha$ -syn(WT or A53T)-expressing constructs and then treated with CsgA-derived amyloidogenic  
 1093 hexapeptides, non-amyloidogenic control or empty vehicle. Scale bar = 20  $\mu$ m in all panels in this  
 1094 Figure. (B) Corrected total cell fluorescence (CTCF shown as mean  $\pm$  SD) from the experiments  
 1095 shown in (A). Amyloidogenic peptides significantly enhanced  $\alpha$ -syn expression and accumulation in  
 1096 the SH-SY5Y cells. (C) SH-SY5Y cells transfected with  $\alpha$ -syn(WT or A53T)-expressing constructs  
 1097 and treated with Rhodamine-conjugated QYGGNN peptides (red) were then stained with anti- $\alpha$ -syn  
 1098 antibodies (green) to show colocalization of CsgA-derived peptides and  $\alpha$ -syn. Insets are enlarged  
 1099 images of the boxed regions. Images were processed using the Leica THUNDER imaging system.  
 1100 The raw images can be found in Figure S6B. (D) Intensity profile for the orange dashed line in (C).  
 1101 (E) Representative results of CCK-8 cell viability assays using  $\alpha$ -syn(WT or A53T)-expressing SH-  
 1102 SY5Y cells treated with amyloidogenic hexapeptides, non-amyloidogenic control or empty vehicle.  
 1103 Mean  $\pm$  SD is shown and single asterisk indicates  $p < 0.05$  in a one-way ANOVA followed by a  
 1104 Tukey's post-hoc test.
